# Supplementary material
Source: Royal Society of Chemistry journal article supplement (doi:10.1039/d5an01287b)
Supplement: d5an01287b1.xlsx [file d5an01287b1.xlsx]

## Sheet: Sheet1
FF	S1	S2	S3	S4	S5	S6	S7	S8	S9	S10	S11	S12
499.767	-15.1517	-15.1469	-15.142	-15.1372	-15.1327	-15.1279	-15.123	-15.1347	-15.1292	-15.1237	-15.1181	-15.0773
501.163	-15.21	-15.2052	-15.2004	-15.1957	-15.1913	-15.1865	-15.1817	-15.1944	-15.1889	-15.1834	-15.1779	-15.1365
502.559	-15.269	-15.2643	-15.2596	-15.2549	-15.2505	-15.2458	-15.2411	-15.2546	-15.2492	-15.2438	-15.2384	-15.1964
503.955	-15.3288	-15.3241	-15.3194	-15.3148	-15.3105	-15.3058	-15.3011	-15.3155	-15.3102	-15.3048	-15.2994	-15.257
505.351	-15.3893	-15.3847	-15.3801	-15.3755	-15.3712	-15.3666	-15.3619	-15.3771	-15.3718	-15.3665	-15.3611	-15.3183
506.747	-15.4506	-15.446	-15.4414	-15.4369	-15.4326	-15.4281	-15.4235	-15.4394	-15.4341	-15.4288	-15.4234	-15.3805
508.143	-15.5128	-15.5082	-15.5036	-15.4991	-15.4948	-15.4903	-15.4857	-15.5023	-15.497	-15.4917	-15.4864	-15.4433
509.539	-15.5758	-15.5712	-15.5666	-15.5621	-15.5579	-15.5533	-15.5488	-15.5659	-15.5606	-15.5553	-15.55	-15.507
510.935	-15.6397	-15.6351	-15.6305	-15.6259	-15.6217	-15.6172	-15.6126	-15.6302	-15.6249	-15.6197	-15.6143	-15.5715
512.331	-15.7045	-15.6998	-15.6952	-15.6907	-15.6864	-15.6818	-15.6773	-15.6953	-15.69	-15.6847	-15.6794	-15.6368
513.727	-15.7702	-15.7655	-15.7609	-15.7563	-15.752	-15.7474	-15.7428	-15.7612	-15.7558	-15.7505	-15.7452	-15.7029
515.123	-15.837	-15.8322	-15.8275	-15.8229	-15.8185	-15.8139	-15.8092	-15.8279	-15.8225	-15.8171	-15.8117	-15.77
516.519	-15.9048	-15.9	-15.8952	-15.8905	-15.8861	-15.8813	-15.8766	-15.8954	-15.89	-15.8846	-15.8791	-15.838
517.915	-15.9737	-15.9688	-15.964	-15.9591	-15.9546	-15.9498	-15.945	-15.9639	-15.9584	-15.9529	-15.9473	-15.907
519.311	-16.0438	-16.0388	-16.0338	-16.0289	-16.0243	-16.0194	-16.0145	-16.0334	-16.0277	-16.0221	-16.0165	-15.977
520.707	-16.1152	-16.11	-16.1049	-16.0999	-16.0952	-16.0901	-16.0851	-16.1038	-16.0981	-16.0924	-16.0867	-16.0481
522.103	-16.1879	-16.1826	-16.1773	-16.1721	-16.1673	-16.1621	-16.1569	-16.1754	-16.1696	-16.1637	-16.1579	-16.1204
523.499	-16.262	-16.2565	-16.2511	-16.2457	-16.2407	-16.2353	-16.23	-16.2482	-16.2422	-16.2362	-16.2302	-16.1939
524.895	-16.3376	-16.3319	-16.3262	-16.3207	-16.3155	-16.31	-16.3044	-16.3222	-16.316	-16.3099	-16.3037	-16.2688
526.291	-16.4147	-16.4088	-16.403	-16.3972	-16.3918	-16.3861	-16.3803	-16.3976	-16.3912	-16.3849	-16.3785	-16.345
527.687	-16.4936	-16.4874	-16.4814	-16.4753	-16.4697	-16.4637	-16.4578	-16.4744	-16.4678	-16.4613	-16.4547	-16.4227
529.083	-16.5742	-16.5678	-16.5615	-16.5552	-16.5494	-16.5431	-16.5369	-16.5528	-16.546	-16.5392	-16.5324	-16.5019
530.479	-16.6568	-16.6501	-16.6435	-16.6369	-16.6308	-16.6243	-16.6178	-16.6329	-16.6258	-16.6187	-16.6117	-16.5829
531.875	-16.7414	-16.7344	-16.7275	-16.7206	-16.7142	-16.7073	-16.7005	-16.7147	-16.7073	-16.7	-16.6927	-16.6656
533.271	-16.8282	-16.8208	-16.8136	-16.8063	-16.7997	-16.7925	-16.7853	-16.7984	-16.7907	-16.7832	-16.7755	-16.7503
534.667	-16.9173	-16.9096	-16.9019	-16.8943	-16.8874	-16.8798	-16.8723	-16.8842	-16.8762	-16.8683	-16.8603	-16.8371
536.063	-17.0088	-17.0007	-16.9927	-16.9847	-16.9774	-16.9694	-16.9616	-16.9723	-16.9639	-16.9556	-16.9473	-16.926
537.459	-17.103	-17.0945	-17.0861	-17.0777	-17.07	-17.0616	-17.0533	-17.0626	-17.0539	-17.0452	-17.0365	-17.0173
538.855	-17.2	-17.1911	-17.1822	-17.1733	-17.1652	-17.1564	-17.1477	-17.1555	-17.1464	-17.1373	-17.1282	-17.1111
540.251	-17.3	-17.2906	-17.2812	-17.2719	-17.2633	-17.2541	-17.2449	-17.2512	-17.2416	-17.2321	-17.2225	-17.2076
541.647	-17.4031	-17.3932	-17.3834	-17.3736	-17.3645	-17.3547	-17.345	-17.3497	-17.3396	-17.3297	-17.3197	-17.307
543.043	-17.5096	-17.4992	-17.4888	-17.4785	-17.469	-17.4587	-17.4484	-17.4513	-17.4408	-17.4304	-17.4199	-17.4094
544.439	-17.6197	-17.6087	-17.5978	-17.5869	-17.5769	-17.566	-17.5553	-17.5562	-17.5452	-17.5343	-17.5232	-17.5151
545.835	-17.7336	-17.722	-17.7106	-17.6991	-17.6886	-17.6771	-17.6657	-17.6647	-17.6531	-17.6417	-17.6301	-17.6243
547.231	-17.8515	-17.8394	-17.8273	-17.8152	-17.8041	-17.7921	-17.7801	-17.777	-17.7649	-17.7528	-17.7407	-17.7372
548.627	-17.9738	-17.9611	-17.9483	-17.9356	-17.9239	-17.9112	-17.8986	-17.8934	-17.8806	-17.8679	-17.8552	-17.8541
550.023	-18.1007	-18.0873	-18.0739	-18.0605	-18.0482	-18.0348	-18.0215	-18.014	-18.0006	-17.9873	-17.9739	-17.9753
551.419	-18.2325	-18.2184	-18.2043	-18.1902	-18.1773	-18.1631	-18.1491	-18.1393	-18.1252	-18.1113	-18.0972	-18.101
552.815	-18.3694	-18.3546	-18.3398	-18.325	-18.3114	-18.2965	-18.2817	-18.2695	-18.2547	-18.2401	-18.2253	-18.2315
554.211	-18.5119	-18.4963	-18.4808	-18.4653	-18.4509	-18.4353	-18.4197	-18.4049	-18.3894	-18.3741	-18.3586	-18.3671
555.607	-18.6603	-18.644	-18.6276	-18.6113	-18.5962	-18.5798	-18.5634	-18.546	-18.5297	-18.5136	-18.4973	-18.5083
557.003	-18.8149	-18.7978	-18.7807	-18.7635	-18.7477	-18.7304	-18.7132	-18.693	-18.676	-18.6591	-18.642	-18.6554
558.399	-18.9762	-18.9583	-18.9403	-18.9223	-18.9057	-18.8876	-18.8695	-18.8464	-18.8286	-18.8109	-18.793	-18.8087
559.795	-19.1446	-19.1258	-19.107	-19.0881	-19.0707	-19.0517	-19.0327	-19.0067	-18.988	-18.9694	-18.9506	-18.9688
561.191	-19.3205	-19.3009	-19.2812	-19.2614	-19.2432	-19.2232	-19.2033	-19.1743	-19.1547	-19.1352	-19.1155	-19.136
562.587	-19.5045	-19.484	-19.4634	-19.4427	-19.4236	-19.4027	-19.3818	-19.3496	-19.3292	-19.3087	-19.2881	-19.3109
563.983	-19.6972	-19.6757	-19.6542	-19.6326	-19.6125	-19.5907	-19.5687	-19.5334	-19.5119	-19.4905	-19.4689	-19.494
565.379	-19.899	-19.8766	-19.8541	-19.8315	-19.8106	-19.7877	-19.7647	-19.726	-19.7036	-19.6812	-19.6586	-19.686
566.775	-20.1106	-20.0873	-20.0638	-20.0402	-20.0184	-19.9944	-19.9704	-19.9282	-19.9048	-19.8814	-19.8577	-19.8873
568.171	-20.3328	-20.3085	-20.284	-20.2594	-20.2366	-20.2116	-20.1864	-20.1407	-20.1162	-20.0917	-20.0669	-20.0988
569.567	-20.5662	-20.5409	-20.5154	-20.4898	-20.466	-20.4399	-20.4136	-20.3642	-20.3387	-20.3131	-20.2872	-20.3213
570.963	-20.8116	-20.7854	-20.7589	-20.7322	-20.7074	-20.6802	-20.6528	-20.5996	-20.573	-20.5462	-20.5191	-20.5554
572.359	-21.07	-21.0428	-21.0153	-20.9876	-20.9617	-20.9334	-20.9048	-20.8478	-20.82	-20.7921	-20.7638	-20.8022
573.755	-21.3422	-21.3141	-21.2856	-21.2569	-21.23	-21.2006	-21.1708	-21.1098	-21.0808	-21.0517	-21.0222	-21.0627
575.151	-21.6294	-21.6004	-21.5709	-21.5411	-21.5133	-21.4827	-21.4518	-21.3866	-21.3565	-21.3262	-21.2954	-21.338
576.547	-21.9326	-21.9027	-21.8723	-21.8416	-21.8128	-21.7811	-21.749	-21.6796	-21.6483	-21.6167	-21.5847	-21.6294
577.943	-22.2531	-22.2224	-22.1912	-22.1595	-22.1298	-22.097	-22.0637	-21.99	-21.9575	-21.9247	-21.8914	-21.9382
579.339	-22.5921	-22.5608	-22.5288	-22.4964	-22.4657	-22.432	-22.3976	-22.3194	-22.2858	-22.2518	-22.2171	-22.266
580.735	-22.9511	-22.9194	-22.8868	-22.8537	-22.8223	-22.7876	-22.7522	-22.6695	-22.6348	-22.5996	-22.5637	-22.6146
582.131	-23.3317	-23.2997	-23.2668	-23.2332	-23.2011	-23.1657	-23.1294	-23.042	-23.0063	-22.97	-22.9329	-22.986
583.527	-23.7353	-23.7035	-23.6705	-23.6366	-23.6042	-23.5682	-23.5312	-23.4392	-23.4026	-23.3653	-23.327	-23.3823
584.923	-24.1636	-24.1323	-24.0997	-24.066	-24.0335	-23.9973	-23.9598	-23.8633	-23.826	-23.7879	-23.7486	-23.8061
586.319	-24.6182	-24.5881	-24.5564	-24.5234	-24.4912	-24.4553	-24.4177	-24.3167	-24.2791	-24.2404	-24.2004	-24.2602
587.715	-25.1004	-25.0723	-25.0423	-25.0108	-24.9796	-24.9445	-24.9075	-24.8023	-24.7648	-24.7259	-24.6854	-24.7477
589.111	-25.6112	-25.5863	-25.5592	-25.5302	-25.5008	-25.4674	-25.4317	-25.323	-25.2862	-25.2477	-25.2074	-25.2722
590.507	-26.1508	-26.1307	-26.108	-26.0829	-26.0566	-26.0263	-25.9931	-25.8817	-25.8466	-25.8094	-25.7699	-25.8376
591.903	-26.718	-26.705	-26.6888	-26.6698	-26.6483	-26.6228	-26.5937	-26.4812	-26.4492	-26.4146	-26.3771	-26.448
593.299	-27.3096	-27.3067	-27.2999	-27.2897	-27.2754	-27.2574	-27.2349	-27.1237	-27.0968	-27.0666	-27.033	-27.1076
594.695	-27.9183	-27.9296	-27.9363	-27.9389	-27.9353	-27.9283	-27.916	-27.8099	-27.7911	-27.7682	-27.7409	-27.8198
596.091	-28.5316	-28.5623	-28.5879	-28.6085	-28.6204	-28.6297	-28.6324	-28.5372	-28.531	-28.5195	-28.5027	-28.5867
597.487	-29.1285	-29.1853	-29.2364	-29.282	-29.3157	-29.3482	-29.3729	-29.2976	-29.3104	-29.3166	-29.3162	-29.4063
598.883	-29.6772	-29.7674	-29.852	-29.931	-29.9944	-30.0591	-30.1151	-30.0727	-30.1134	-30.1463	-30.1711	-30.2686
600.279	-30.1346	-30.265	-30.3908	-30.5117	-30.6136	-30.7208	-30.8189	-30.8273	-30.9077	-30.9795	-31.0421	-31.1483
601.675	-30.4491	-30.6235	-30.7955	-30.9648	-31.1122	-31.271	-31.4221	-31.5022	-31.6359	-31.7613	-31.8775	-31.9934
603.071	-30.5725	-30.7886	-31.0059	-31.2238	-31.4186	-31.6326	-31.8423	-32.0127	-32.2103	-32.4025	-32.5881	-32.7132
604.467	-30.4751	-30.7238	-30.9773	-31.2354	-31.4707	-31.7335	-31.9969	-32.263	-32.5253	-32.7877	-33.0495	-33.1805
605.863	-30.1591	-30.426	-30.7005	-30.9828	-31.2439	-31.5385	-31.8386	-32.1851	-32.4967	-32.8153	-33.1409	-33.2714
607.259	-29.6568	-29.9269	-30.2061	-30.4946	-30.7635	-31.0687	-31.3822	-31.7769	-32.111	-32.4567	-32.8152	-32.9386
608.655	-29.0179	-29.2795	-29.5501	-29.8301	-30.092	-30.3893	-30.6959	-31.1039	-31.4338	-31.7767	-32.1342	-32.2463
610.051	-28.2932	-28.539	-28.793	-29.0554	-29.3009	-29.5791	-29.8658	-30.2615	-30.5697	-30.8897	-31.223	-31.3235
611.447	-27.5247	-27.7515	-27.9853	-28.2261	-28.4511	-28.7053	-28.9665	-29.3356	-29.6146	-29.9032	-30.2026	-30.2931
612.843	-26.743	-26.95	-27.163	-27.3815	-27.5855	-27.8148	-28.0498	-28.3869	-28.6356	-28.8918	-29.1563	-29.239
614.239	-25.9678	-26.1561	-26.3491	-26.5466	-26.7305	-26.9365	-27.147	-27.4517	-27.6724	-27.8987	-28.1312	-28.208
615.635	-25.2112	-25.3822	-25.557	-25.7354	-25.9012	-26.0862	-26.2747	-26.5492	-26.7451	-26.9453	-27.1501	-27.2225
617.031	-24.4798	-24.6353	-24.7938	-24.9552	-25.1049	-25.2714	-25.4407	-25.6879	-25.8625	-26.0403	-26.2215	-26.2907
618.427	-23.7766	-23.9183	-24.0625	-24.2089	-24.3445	-24.495	-24.6476	-24.8705	-25.0269	-25.1857	-25.3471	-25.4138
619.823	-23.1027	-23.2322	-23.3638	-23.497	-23.6204	-23.7568	-23.895	-24.0966	-24.2374	-24.38	-24.5246	-24.5894
621.219	-22.4577	-22.5765	-22.6969	-22.8187	-22.9313	-23.0556	-23.1812	-23.364	-23.4915	-23.6203	-23.7507	-23.8139
622.615	-21.8407	-21.95	-22.0606	-22.1722	-22.2754	-22.3891	-22.5039	-22.6701	-22.786	-22.9031	-23.0213	-23.0832
624.011	-21.2503	-21.3511	-21.453	-21.5558	-21.6507	-21.755	-21.8603	-22.0119	-22.1179	-22.2247	-22.3325	-22.3932
625.407	-20.685	-20.7783	-20.8725	-20.9673	-21.0549	-21.151	-21.2479	-21.3866	-21.4838	-21.5818	-21.6804	-21.7402
626.803	-20.1432	-20.2297	-20.3171	-20.4049	-20.4859	-20.5748	-20.6643	-20.7914	-20.8809	-20.9711	-21.0618	-21.1207
628.199	-19.6234	-19.7039	-19.785	-19.8665	-19.9418	-20.0241	-20.1071	-20.2238	-20.3066	-20.3899	-20.4736	-20.5317
629.595	-19.1241	-19.1991	-19.2747	-19.3506	-19.4206	-19.4972	-19.5742	-19.6816	-19.7584	-19.8355	-19.9131	-19.9704
630.991	-18.6439	-18.714	-18.7846	-18.8554	-18.9207	-18.992	-19.0638	-19.1627	-19.2341	-19.3058	-19.3778	-19.4344
632.387	-18.1817	-18.2473	-18.3133	-18.3795	-18.4405	-18.5071	-18.5741	-18.6653	-18.7319	-18.7987	-18.8657	-18.9216
633.783	-17.7362	-17.7977	-17.8596	-17.9215	-17.9786	-18.0409	-18.1035	-18.1878	-18.25	-18.3124	-18.375	-18.4301
635.179	-17.3064	-17.3641	-17.4221	-17.4802	-17.5338	-17.5922	-17.6508	-17.7288	-17.787	-17.8453	-17.9038	-17.9582
636.575	-16.8912	-16.9455	-17	-17.0545	-17.1049	-17.1596	-17.2147	-17.2868	-17.3413	-17.396	-17.4508	-17.5045
637.971	-16.4898	-16.5409	-16.5922	-16.6435	-16.6908	-16.7423	-16.794	-16.8607	-16.9119	-16.9632	-17.0146	-17.0676
639.367	-16.1014	-16.1495	-16.1978	-16.2461	-16.2906	-16.339	-16.3877	-16.4494	-16.4975	-16.5458	-16.5941	-16.6463
640.763	-15.7252	-15.7706	-15.8161	-15.8615	-15.9035	-15.9491	-15.9949	-16.052	-16.0973	-16.1427	-16.1881	-16.2395
642.159	-15.3604	-15.4033	-15.4462	-15.4891	-15.5287	-15.5716	-15.6148	-15.6676	-15.7103	-15.753	-15.7958	-15.8464
643.555	-15.0066	-15.0471	-15.0876	-15.128	-15.1654	-15.2059	-15.2466	-15.2954	-15.3357	-15.376	-15.4162	-15.4661
644.951	-14.6631	-14.7013	-14.7396	-14.7777	-14.813	-14.8512	-14.8896	-14.9348	-14.9727	-15.0107	-15.0487	-15.0977
646.347	-14.3294	-14.3655	-14.4016	-14.4376	-14.471	-14.507	-14.5432	-14.585	-14.6208	-14.6566	-14.6924	-14.7407
647.743	-14.0049	-14.039	-14.0732	-14.1072	-14.1387	-14.1727	-14.2069	-14.2454	-14.2792	-14.3131	-14.3468	-14.3942
649.139	-13.6893	-13.7216	-13.7538	-13.7859	-13.8157	-13.8479	-13.8801	-13.9156	-13.9475	-13.9794	-14.0113	-14.0579
650.535	-13.3821	-13.4126	-13.4431	-13.4734	-13.5015	-13.5319	-13.5624	-13.595	-13.6251	-13.6553	-13.6854	-13.7311
651.931	-13.0829	-13.1117	-13.1405	-13.1692	-13.1958	-13.2244	-13.2532	-13.2831	-13.3116	-13.3401	-13.3685	-13.4133
653.327	-12.7913	-12.8186	-12.8458	-12.8729	-12.898	-12.9251	-12.9522	-12.9796	-13.0065	-13.0334	-13.0602	-13.1041
654.723	-12.5072	-12.5329	-12.5586	-12.5842	-12.6079	-12.6334	-12.6591	-12.6841	-12.7095	-12.7349	-12.7602	-12.8031
656.119	-12.23	-12.2543	-12.2786	-12.3027	-12.3251	-12.3492	-12.3734	-12.3962	-12.4202	-12.4441	-12.4679	-12.51
657.515	-11.9596	-11.9826	-12.0055	-12.0282	-12.0493	-12.072	-12.0948	-12.1155	-12.1381	-12.1607	-12.1832	-12.2243
658.911	-11.6957	-11.7173	-11.7389	-11.7603	-11.7803	-11.8017	-11.8231	-11.8419	-11.8632	-11.8844	-11.9056	-11.9457
660.307	-11.438	-11.4584	-11.4787	-11.4989	-11.5177	-11.5378	-11.558	-11.5749	-11.5949	-11.6149	-11.6348	-11.674
661.703	-11.1863	-11.2055	-11.2246	-11.2436	-11.2613	-11.2802	-11.2992	-11.3143	-11.3331	-11.352	-11.3707	-11.4089
663.099	-10.9403	-10.9584	-10.9764	-10.9942	-11.0109	-11.0286	-11.0465	-11.0599	-11.0776	-11.0953	-11.1129	-11.1501
664.495	-10.7	-10.717	-10.7339	-10.7506	-10.7662	-10.7829	-10.7996	-10.8114	-10.828	-10.8446	-10.8611	-10.8973
665.891	-10.465	-10.4809	-10.4968	-10.5124	-10.5271	-10.5427	-10.5584	-10.5686	-10.5842	-10.5998	-10.6152	-10.6504
667.287	-10.2352	-10.2502	-10.265	-10.2796	-10.2933	-10.3079	-10.3226	-10.3314	-10.346	-10.3605	-10.375	-10.4091
668.683	-10.0105	-10.0244	-10.0383	-10.0519	-10.0648	-10.0784	-10.0921	-10.0995	-10.1131	-10.1267	-10.1401	-10.1733
670.079	-9.79061	-9.80364	-9.81652	-9.82923	-9.8412	-9.85387	-9.8666	-9.87277	-9.88546	-9.89807	-9.9106	-9.94271
671.475	-9.57547	-9.58759	-9.59956	-9.61136	-9.6225	-9.63426	-9.64608	-9.65102	-9.66281	-9.67452	-9.68615	-9.71721
672.871	-9.36491	-9.37615	-9.38725	-9.39817	-9.4085	-9.41939	-9.43033	-9.43411	-9.44503	-9.45587	-9.46662	-9.49664
674.267	-9.1588	-9.1692	-9.17945	-9.18952	-9.19907	-9.20911	-9.2192	-9.22188	-9.23196	-9.24195	-9.25187	-9.28083
675.663	-8.957	-8.96659	-8.97602	-8.98527	-8.99408	-9.0033	-9.01256	-9.0142	-9.02346	-9.03264	-9.04174	-9.06964
677.059	-8.75941	-8.76821	-8.77685	-8.78531	-8.79338	-8.80181	-8.81028	-8.81092	-8.8194	-8.8278	-8.83611	-8.86295
678.455	-8.56591	-8.57394	-8.58181	-8.58951	-8.59688	-8.60454	-8.61224	-8.61194	-8.61966	-8.62729	-8.63484	-8.66061
679.851	-8.37639	-8.38368	-8.39081	-8.39776	-8.40445	-8.41137	-8.41832	-8.41713	-8.42411	-8.431	-8.43781	-8.46252
681.247	-8.19075	-8.19732	-8.20373	-8.20996	-8.21599	-8.22218	-8.22842	-8.22638	-8.23264	-8.23881	-8.2449	-8.26854
682.643	-8.00889	-8.01476	-8.02047	-8.026	-8.03139	-8.03689	-8.04242	-8.03958	-8.04514	-8.05062	-8.05601	-8.07858
684.039	-7.83071	-7.83591	-7.84094	-7.84579	-7.85056	-7.85538	-7.86023	-7.85663	-7.86152	-7.86632	-7.87103	-7.89253
685.435	-7.65614	-7.66068	-7.66505	-7.66924	-7.67341	-7.67757	-7.68176	-7.67744	-7.68167	-7.68581	-7.68987	-7.7103
686.831	-7.48508	-7.48899	-7.49271	-7.49626	-7.49984	-7.50336	-7.50691	-7.50191	-7.5055	-7.509	-7.51242	-7.53178
688.227	-7.31746	-7.32074	-7.32385	-7.32677	-7.32978	-7.33268	-7.33561	-7.32995	-7.33293	-7.33581	-7.3386	-7.3569
689.623	-7.1532	-7.15588	-7.15837	-7.1607	-7.16315	-7.16544	-7.16777	-7.1615	-7.16387	-7.16614	-7.16833	-7.18556
691.019	-6.99222	-6.99431	-6.99622	-6.99795	-6.99987	-7.00157	-7.0033	-6.99646	-6.99824	-6.99992	-7.00152	-7.01768
692.415	-6.83446	-6.83598	-6.83731	-6.83847	-6.83986	-6.84099	-6.84215	-6.83476	-6.83596	-6.83707	-6.83809	-6.85319
693.811	-6.67984	-6.68081	-6.68158	-6.68219	-6.68306	-6.68364	-6.68423	-6.67632	-6.67697	-6.67752	-6.67798	-6.69202
695.207	-6.52831	-6.52874	-6.52897	-6.52903	-6.5294	-6.52943	-6.52949	-6.52109	-6.52119	-6.5212	-6.52111	-6.5341
696.603	-6.37981	-6.3797	-6.3794	-6.37893	-6.37882	-6.37832	-6.37784	-6.36899	-6.36856	-6.36803	-6.36741	-6.37935
697.999	-6.23427	-6.23364	-6.23283	-6.23184	-6.23126	-6.23024	-6.22925	-6.21996	-6.21901	-6.21796	-6.21682	-6.22771
699.395	-6.09163	-6.0905	-6.08919	-6.08769	-6.08665	-6.08513	-6.08363	-6.07393	-6.07248	-6.07092	-6.06927	-6.07913
700.791	-5.95185	-5.95023	-5.94842	-5.94644	-5.94494	-5.94293	-5.94094	-5.93086	-5.92891	-5.92685	-5.92471	-5.93354
702.187	-5.81487	-5.81277	-5.81048	-5.80802	-5.80608	-5.80359	-5.80112	-5.79068	-5.78825	-5.78571	-5.78307	-5.79088
703.583	-5.68063	-5.67807	-5.67531	-5.67238	-5.67002	-5.66706	-5.66412	-5.65334	-5.65044	-5.64742	-5.64432	-5.65111
704.979	-5.5491	-5.54608	-5.54287	-5.53948	-5.53669	-5.53328	-5.52988	-5.51879	-5.51542	-5.51195	-5.50838	-5.51416
706.375	-5.42022	-5.41676	-5.4131	-5.40926	-5.40607	-5.40221	-5.39836	-5.38698	-5.38316	-5.37923	-5.37521	-5.37999
707.771	-5.29395	-5.29005	-5.28595	-5.28169	-5.27809	-5.2738	-5.26951	-5.25786	-5.2536	-5.24923	-5.24476	-5.24855
709.167	-5.17025	-5.16592	-5.1614	-5.1567	-5.15272	-5.148	-5.14329	-5.13138	-5.12669	-5.12188	-5.11698	-5.11979
710.563	-5.04907	-5.04433	-5.03939	-5.03428	-5.02991	-5.02477	-5.01965	-5.0075	-5.00239	-4.99716	-4.99184	-4.99367
711.959	-4.93037	-4.92522	-4.91987	-4.91436	-4.90962	-4.90408	-4.89854	-4.88618	-4.88065	-4.87501	-4.86927	-4.87014
713.355	-4.81411	-4.80857	-4.80282	-4.79691	-4.79181	-4.78587	-4.77994	-4.76737	-4.76143	-4.75539	-4.74924	-4.74917
714.751	-4.70026	-4.69433	-4.6882	-4.68189	-4.67644	-4.67011	-4.66379	-4.65103	-4.6447	-4.63826	-4.63172	-4.63071
716.147	-4.58877	-4.58246	-4.57595	-4.56927	-4.56346	-4.55676	-4.55006	-4.53713	-4.53041	-4.52358	-4.51666	-4.51471
717.543	-4.47961	-4.47294	-4.46606	-4.459	-4.45286	-4.44578	-4.43871	-4.42562	-4.41853	-4.41132	-4.40401	-4.40116
718.939	-4.37276	-4.36572	-4.35847	-4.35106	-4.34458	-4.33714	-4.3297	-4.31648	-4.30901	-4.30143	-4.29375	-4.28999
720.335	-4.26816	-4.26077	-4.25317	-4.2454	-4.2386	-4.23081	-4.22301	-4.20966	-4.20183	-4.19388	-4.18584	-4.18119
721.731	-4.1658	-4.15806	-4.15011	-4.142	-4.13488	-4.12674	-4.1186	-4.10512	-4.09694	-4.08864	-4.08024	-4.07472
723.127	-4.06563	-4.05755	-4.04927	-4.04082	-4.03338	-4.0249	-4.01642	-4.00285	-3.99432	-3.98567	-3.97692	-3.97053
724.523	-3.96763	-3.95922	-3.9506	-3.94182	-3.93409	-3.92528	-3.91646	-3.90279	-3.89392	-3.88493	-3.87584	-3.86861
725.919	-3.87176	-3.86303	-3.85409	-3.84499	-3.83695	-3.82782	-3.81868	-3.80493	-3.79573	-3.7864	-3.77698	-3.76891
727.315	-3.778	-3.76896	-3.7597	-3.75028	-3.74196	-3.73251	-3.72305	-3.70923	-3.6997	-3.69005	-3.68029	-3.67141
728.711	-3.68632	-3.67697	-3.66741	-3.65768	-3.64907	-3.63931	-3.62954	-3.61566	-3.60581	-3.59584	-3.58576	-3.57608
730.107	-3.59669	-3.58704	-3.57717	-3.56714	-3.55825	-3.54819	-3.53812	-3.52418	-3.51402	-3.50374	-3.49335	-3.48289
731.503	-3.50909	-3.49913	-3.48897	-3.47865	-3.46949	-3.45913	-3.44877	-3.43478	-3.42432	-3.41373	-3.40304	-3.3918
732.899	-3.42347	-3.41323	-3.40279	-3.39217	-3.38275	-3.3721	-3.36145	-3.34743	-3.33666	-3.32577	-3.31478	-3.30279
734.295	-3.33983	-3.32931	-3.31858	-3.30768	-3.298	-3.28707	-3.27614	-3.26209	-3.25103	-3.23985	-3.22856	-3.21584
735.691	-3.25813	-3.24734	-3.23633	-3.22516	-3.21522	-3.20402	-3.19281	-3.17874	-3.1674	-3.15593	-3.14436	-3.13092
737.087	-3.17835	-3.16729	-3.15601	-3.14457	-3.13439	-3.12292	-3.11143	-3.09735	-3.08573	-3.07398	-3.06213	-3.04799
738.483	-3.10046	-3.08914	-3.0776	-3.0659	-3.05547	-3.04374	-3.03199	-3.0179	-3.00601	-2.99398	-2.98186	-2.96704
739.879	-3.02444	-3.01286	-3.00107	-2.98911	-2.97845	-2.96646	-2.95446	-2.94037	-2.92821	-2.91591	-2.90352	-2.88804
741.275	-2.95027	-2.93844	-2.9264	-2.91419	-2.9033	-2.89106	-2.8788	-2.86472	-2.8523	-2.83974	-2.82709	-2.81096
742.671	-2.87792	-2.86585	-2.85356	-2.84111	-2.82999	-2.81751	-2.80501	-2.79093	-2.77826	-2.76545	-2.75254	-2.73578
744.067	-2.80737	-2.79505	-2.78253	-2.76984	-2.75851	-2.74578	-2.73304	-2.71899	-2.70606	-2.693	-2.67984	-2.66249
745.463	-2.73859	-2.72605	-2.71329	-2.70037	-2.68882	-2.67587	-2.66289	-2.64886	-2.63569	-2.62239	-2.60898	-2.59104
746.859	-2.67157	-2.6588	-2.64582	-2.63267	-2.62092	-2.60773	-2.59453	-2.58052	-2.56711	-2.55358	-2.53993	-2.52143
748.255	-2.60628	-2.59329	-2.58009	-2.56672	-2.55476	-2.54136	-2.52794	-2.51395	-2.50031	-2.48655	-2.47267	-2.45362
749.651	-2.5427	-2.52949	-2.51608	-2.5025	-2.49034	-2.47673	-2.46309	-2.44913	-2.43527	-2.42128	-2.40718	-2.3876
751.047	-2.48081	-2.46739	-2.45377	-2.43998	-2.42763	-2.41381	-2.39996	-2.38603	-2.37196	-2.35774	-2.34342	-2.32334
752.443	-2.42058	-2.40696	-2.39314	-2.37915	-2.36661	-2.35258	-2.33853	-2.32464	-2.31035	-2.29592	-2.28139	-2.26082
753.839	-2.362	-2.34819	-2.33416	-2.31998	-2.30726	-2.29303	-2.27878	-2.26493	-2.25043	-2.2358	-2.22106	-2.20003
755.235	-2.30504	-2.29104	-2.27683	-2.26245	-2.24955	-2.23514	-2.22069	-2.20688	-2.19218	-2.17734	-2.1624	-2.14093
756.631	-2.24969	-2.2355	-2.22111	-2.20655	-2.19348	-2.17887	-2.16424	-2.15047	-2.13557	-2.12054	-2.1054	-2.08351
758.027	-2.19593	-2.18156	-2.16698	-2.15224	-2.139	-2.12422	-2.10941	-2.09567	-2.08059	-2.06537	-2.05003	-2.02775
759.423	-2.14372	-2.12918	-2.11443	-2.09951	-2.08611	-2.07115	-2.05617	-2.04248	-2.02721	-2.0118	-1.99628	-1.97363
760.819	-2.09306	-2.07835	-2.06343	-2.04835	-2.03479	-2.01966	-2.0045	-1.99086	-1.97541	-1.95982	-1.94412	-1.92112
762.215	-2.04392	-2.02905	-2.01396	-1.99872	-1.98501	-1.96972	-1.9544	-1.94079	-1.92517	-1.90941	-1.89354	-1.8702
763.611	-1.99629	-1.98125	-1.96601	-1.95061	-1.93676	-1.9213	-1.90582	-1.89226	-1.87647	-1.86055	-1.84451	-1.82086
765.007	-1.95014	-1.93495	-1.91956	-1.904	-1.89001	-1.8744	-1.85876	-1.84525	-1.8293	-1.81321	-1.79701	-1.77308
766.403	-1.90545	-1.89011	-1.87457	-1.85887	-1.84474	-1.82899	-1.8132	-1.79973	-1.78362	-1.76738	-1.75102	-1.72683
767.799	-1.8622	-1.84672	-1.83104	-1.8152	-1.80094	-1.78504	-1.76911	-1.75568	-1.73942	-1.72303	-1.70652	-1.68209
769.195	-1.82038	-1.80477	-1.78895	-1.77297	-1.75858	-1.74255	-1.72648	-1.71309	-1.69669	-1.68015	-1.66349	-1.63885
770.591	-1.77996	-1.76422	-1.74827	-1.73216	-1.71765	-1.70148	-1.68529	-1.67193	-1.65539	-1.63871	-1.62192	-1.59708
771.987	-1.74092	-1.72505	-1.70898	-1.69275	-1.67812	-1.66183	-1.64551	-1.63219	-1.61551	-1.5987	-1.58177	-1.55676
773.383	-1.70325	-1.68726	-1.67107	-1.65472	-1.63998	-1.62357	-1.60712	-1.59384	-1.57704	-1.5601	-1.54304	-1.51788
774.779	-1.66692	-1.65082	-1.63452	-1.61805	-1.6032	-1.58668	-1.57011	-1.55686	-1.53994	-1.52288	-1.5057	-1.48042
776.175	-1.63192	-1.61571	-1.59929	-1.58272	-1.56777	-1.55114	-1.53446	-1.52124	-1.5042	-1.48702	-1.46973	-1.44435
777.571	-1.59822	-1.58191	-1.56539	-1.54871	-1.53367	-1.51693	-1.50015	-1.48695	-1.4698	-1.45252	-1.43511	-1.40965
778.967	-1.56581	-1.54939	-1.53278	-1.51601	-1.50087	-1.48403	-1.46715	-1.45398	-1.43673	-1.41933	-1.40182	-1.37631
780.363	-1.53466	-1.51815	-1.50144	-1.48458	-1.46935	-1.45242	-1.43545	-1.4223	-1.40495	-1.38745	-1.36984	-1.3443
781.759	-1.50476	-1.48816	-1.47136	-1.45441	-1.4391	-1.42208	-1.40502	-1.39189	-1.37445	-1.35686	-1.33916	-1.3136
783.155	-1.47608	-1.4594	-1.44252	-1.42549	-1.4101	-1.393	-1.37585	-1.36274	-1.3452	-1.32753	-1.30974	-1.2842
784.551	-1.4486	-1.43184	-1.41489	-1.39778	-1.38233	-1.36514	-1.34792	-1.33482	-1.3172	-1.29945	-1.28157	-1.25607
785.947	-1.42231	-1.40548	-1.38846	-1.37128	-1.35575	-1.3385	-1.3212	-1.30811	-1.29042	-1.27259	-1.25464	-1.22919
787.343	-1.39718	-1.38029	-1.3632	-1.34595	-1.33037	-1.31304	-1.29568	-1.28259	-1.26483	-1.24693	-1.22891	-1.20354
788.739	-1.37319	-1.35624	-1.33909	-1.32179	-1.30614	-1.28876	-1.27134	-1.25824	-1.24042	-1.22246	-1.20437	-1.1791
790.135	-1.35033	-1.33332	-1.31612	-1.29876	-1.28306	-1.26562	-1.24815	-1.23505	-1.21716	-1.19914	-1.181	-1.15585
791.531	-1.32857	-1.31151	-1.29426	-1.27685	-1.26111	-1.24362	-1.22609	-1.21298	-1.19505	-1.17697	-1.15878	-1.13377
792.927	-1.30789	-1.29079	-1.27349	-1.25604	-1.24025	-1.22272	-1.20514	-1.19202	-1.17404	-1.15592	-1.13768	-1.11284
794.323	-1.28827	-1.27113	-1.25379	-1.2363	-1.22048	-1.20291	-1.18529	-1.17215	-1.15413	-1.13597	-1.11769	-1.09303
795.719	-1.26969	-1.25251	-1.23514	-1.21762	-1.20177	-1.18416	-1.16651	-1.15335	-1.13529	-1.1171	-1.09878	-1.07433
797.115	-1.25212	-1.23492	-1.21752	-1.19998	-1.18409	-1.16646	-1.14878	-1.13559	-1.1175	-1.09928	-1.08094	-1.05671
798.511	-1.23556	-1.21833	-1.20091	-1.18334	-1.16743	-1.14978	-1.13207	-1.11885	-1.10075	-1.0825	-1.06413	-1.04015
799.907	-1.21996	-1.20272	-1.18528	-1.1677	-1.15177	-1.1341	-1.11638	-1.10312	-1.08499	-1.06673	-1.04835	-1.02462
801.303	-1.20532	-1.18806	-1.17062	-1.15302	-1.13709	-1.1194	-1.10166	-1.08836	-1.07023	-1.05196	-1.03356	-1.01012
802.699	-1.19161	-1.17435	-1.1569	-1.13929	-1.12335	-1.10565	-1.08791	-1.07457	-1.05643	-1.03815	-1.01975	-0.996602
804.095	-1.17881	-1.16154	-1.14409	-1.12649	-1.11054	-1.09285	-1.0751	-1.06171	-1.04357	-1.02529	-1.00689	-0.984059
805.491	-1.1669	-1.14963	-1.13219	-1.11459	-1.09864	-1.08095	-1.06321	-1.04976	-1.03163	-1.01336	-0.994962	-0.972464
806.887	-1.15585	-1.13859	-1.12116	-1.10357	-1.08763	-1.06995	-1.05222	-1.0387	-1.02058	-1.00233	-0.983945	-0.961793
808.283	-1.14564	-1.1284	-1.11098	-1.09341	-1.07748	-1.05981	-1.0421	-1.02852	-1.01042	-0.992176	-0.973813	-0.952023
809.679	-1.13625	-1.11903	-1.10163	-1.08408	-1.06817	-1.05052	-1.03282	-1.01918	-1.0011	-0.982884	-0.964545	-0.943132
811.075	-1.12766	-1.11046	-1.09309	-1.07556	-1.05967	-1.04205	-1.02438	-1.01066	-0.992611	-0.974426	-0.956117	-0.935095
812.471	-1.11984	-1.10267	-1.08533	-1.06784	-1.05197	-1.03438	-1.01674	-1.00295	-0.98493	-0.96678	-0.948508	-0.927889
813.867	-1.11277	-1.09564	-1.07833	-1.06088	-1.04505	-1.02749	-1.00988	-0.996007	-0.978032	-0.959923	-0.941692	-0.921489
815.263	-1.10643	-1.08934	-1.07207	-1.05466	-1.03886	-1.02135	-1.00378	-0.989822	-0.971893	-0.953831	-0.935648	-0.915872
816.659	-1.1008	-1.08375	-1.06653	-1.04916	-1.03341	-1.01594	-0.99842	-0.984367	-0.966491	-0.948482	-0.930351	-0.911013
818.055	-1.09584	-1.07884	-1.06168	-1.04436	-1.02865	-1.01123	-0.993766	-0.979621	-0.961802	-0.943851	-0.925779	-0.906887
819.451	-1.09155	-1.0746	-1.05749	-1.04024	-1.02457	-1.00721	-0.989801	-0.975558	-0.957802	-0.939916	-0.921906	-0.903471
820.847	-1.08788	-1.071	-1.05395	-1.03676	-1.02115	-1.00385	-0.986498	-0.972156	-0.954469	-0.936651	-0.918712	-0.900739
822.243	-1.08483	-1.06801	-1.05103	-1.0339	-1.01835	-1.00112	-0.983836	-0.969392	-0.951777	-0.934034	-0.916169	-0.898667
823.639	-1.08237	-1.06562	-1.04871	-1.03165	-1.01616	-0.999	-0.98179	-0.967239	-0.949703	-0.93204	-0.914255	-0.897229
825.035	-1.08047	-1.06379	-1.04696	-1.02998	-1.01456	-0.99747	-0.980335	-0.965677	-0.948225	-0.930646	-0.912947	-0.8964
826.431	-1.07911	-1.06251	-1.04575	-1.02886	-1.01351	-0.996502	-0.979448	-0.964679	-0.947317	-0.929828	-0.91222	-0.896157
827.827	-1.07827	-1.06175	-1.04508	-1.02827	-1.013	-0.996073	-0.979105	-0.964224	-0.946955	-0.929562	-0.912049	-0.896473
829.223	-1.07792	-1.06149	-1.04491	-1.02818	-1.01299	-0.99616	-0.979281	-0.964287	-0.947117	-0.929823	-0.912411	-0.897322
830.619	-1.07804	-1.0617	-1.04521	-1.02858	-1.01348	-0.996737	-0.979952	-0.964843	-0.947777	-0.930588	-0.913281	-0.898681
832.015	-1.0786	-1.06236	-1.04597	-1.02944	-1.01442	-0.997782	-0.981096	-0.965871	-0.948914	-0.931833	-0.914637	-0.900523
833.411	-1.07959	-1.06345	-1.04716	-1.03074	-1.01581	-0.999269	-0.982687	-0.967345	-0.950501	-0.933534	-0.916453	-0.902825
834.807	-1.08098	-1.06495	-1.04876	-1.03244	-1.01761	-1.00118	-0.984701	-0.969243	-0.952515	-0.935667	-0.918705	-0.90556
836.203	-1.08275	-1.06682	-1.05074	-1.03453	-1.0198	-1.00348	-0.987115	-0.971541	-0.954934	-0.938209	-0.921369	-0.908703
837.599	-1.08487	-1.06905	-1.05308	-1.03699	-1.02236	-1.00615	-0.989905	-0.974216	-0.957734	-0.941134	-0.924423	-0.91223
838.995	-1.08732	-1.07161	-1.05577	-1.03979	-1.02527	-1.00918	-0.993047	-0.977243	-0.960891	-0.944422	-0.927842	-0.916116
840.391	-1.09007	-1.07449	-1.05876	-1.04291	-1.02849	-1.01253	-0.996519	-0.980601	-0.964382	-0.948048	-0.931603	-0.920336
841.787	-1.09312	-1.07765	-1.06205	-1.04632	-1.03202	-1.01618	-1.0003	-0.984268	-0.968185	-0.951988	-0.935682	-0.924866
843.183	-1.09642	-1.08109	-1.06561	-1.05001	-1.03582	-1.02011	-1.00436	-0.988218	-0.972275	-0.95622	-0.940057	-0.929682
844.579	-1.09997	-1.08476	-1.06941	-1.05394	-1.03988	-1.0243	-1.00868	-0.992432	-0.976632	-0.960722	-0.944705	-0.934759
845.975	-1.10374	-1.08866	-1.07345	-1.05811	-1.04416	-1.02872	-1.01323	-0.996886	-0.981232	-0.96547	-0.949602	-0.940074
847.371	-1.10771	-1.09276	-1.07768	-1.06248	-1.04866	-1.03335	-1.018	-1.00156	-0.986055	-0.970442	-0.954727	-0.945604
848.767	-1.11186	-1.09705	-1.0821	-1.06704	-1.05334	-1.03818	-1.02297	-1.00643	-0.991078	-0.975618	-0.960057	-0.951326
850.163	-1.11616	-1.10149	-1.08669	-1.07177	-1.0582	-1.04317	-1.02811	-1.01148	-0.996279	-0.980977	-0.965573	-0.957216
851.559	-1.12061	-1.10607	-1.09141	-1.07664	-1.06319	-1.04832	-1.0334	-1.01668	-1.00164	-0.986495	-0.97125	-0.963253
852.955	-1.12517	-1.11078	-1.09626	-1.08163	-1.06832	-1.05359	-1.03882	-1.02202	-1.00714	-0.992152	-0.97707	-0.969415
854.351	-1.12983	-1.11558	-1.10121	-1.08673	-1.07355	-1.05897	-1.04435	-1.02748	-1.01275	-0.99793	-0.983011	-0.97568
855.747	-1.13457	-1.12047	-1.10624	-1.09191	-1.07887	-1.06444	-1.04997	-1.03303	-1.01847	-1.00381	-0.989054	-0.982029
857.143	-1.13938	-1.12542	-1.11134	-1.09716	-1.08426	-1.06997	-1.05566	-1.03866	-1.02426	-1.00977	-0.995179	-0.98844
858.539	-1.14423	-1.13042	-1.11649	-1.10246	-1.08969	-1.07556	-1.0614	-1.04435	-1.03012	-1.01579	-1.00137	-0.994894
859.935	-1.14911	-1.13545	-1.12167	-1.10779	-1.09516	-1.08119	-1.06718	-1.05008	-1.03602	-1.02185	-1.0076	-1.00137
861.331	-1.154	-1.14049	-1.12686	-1.11314	-1.10065	-1.08683	-1.07298	-1.05584	-1.04194	-1.02794	-1.01386	-1.00786
862.727	-1.15889	-1.14553	-1.13205	-1.11848	-1.10613	-1.09247	-1.07877	-1.06161	-1.04787	-1.03405	-1.02013	-1.01433
864.123	-1.16376	-1.15055	-1.13723	-1.12381	-1.1116	-1.09809	-1.08455	-1.06737	-1.0538	-1.04014	-1.0264	-1.02077
865.519	-1.1686	-1.15554	-1.14237	-1.1291	-1.11703	-1.10368	-1.0903	-1.07311	-1.0597	-1.04621	-1.03264	-1.02716
866.915	-1.17339	-1.16048	-1.14746	-1.13435	-1.12242	-1.10923	-1.096	-1.07881	-1.06557	-1.05225	-1.03884	-1.0335
868.311	-1.17812	-1.16536	-1.15249	-1.13954	-1.12775	-1.11471	-1.10164	-1.08446	-1.07138	-1.05823	-1.04499	-1.03976
869.707	-1.18278	-1.17017	-1.15746	-1.14465	-1.133	-1.12012	-1.10721	-1.09004	-1.07713	-1.06414	-1.05108	-1.04593
871.103	-1.18736	-1.1749	-1.16233	-1.14968	-1.13817	-1.12545	-1.11269	-1.09555	-1.08281	-1.06998	-1.05709	-1.05199
872.499	-1.19185	-1.17953	-1.16712	-1.15462	-1.14325	-1.13067	-1.11808	-1.10098	-1.08839	-1.07573	-1.063	-1.05794
873.895	-1.19623	-1.18406	-1.17179	-1.15945	-1.14821	-1.13579	-1.12335	-1.1063	-1.09388	-1.08138	-1.06882	-1.06376
875.291	-1.2005	-1.18848	-1.17636	-1.16416	-1.15306	-1.14079	-1.1285	-1.11152	-1.09925	-1.08692	-1.07451	-1.06944
876.687	-1.20465	-1.19277	-1.1808	-1.16874	-1.15778	-1.14567	-1.13353	-1.11661	-1.10451	-1.09233	-1.08009	-1.07498
878.083	-1.20867	-1.19693	-1.1851	-1.1732	-1.16237	-1.1504	-1.13841	-1.12158	-1.10963	-1.09761	-1.08553	-1.08036
879.479	-1.21255	-1.20096	-1.18927	-1.17751	-1.16681	-1.155	-1.14315	-1.12642	-1.11462	-1.10276	-1.09083	-1.08557
880.875	-1.2163	-1.20484	-1.19329	-1.18168	-1.17111	-1.15944	-1.14774	-1.13111	-1.11947	-1.10775	-1.09598	-1.09062
882.271	-1.2199	-1.20858	-1.19717	-1.18569	-1.17525	-1.16372	-1.15217	-1.13566	-1.12416	-1.1126	-1.10098	-1.09548
883.667	-1.22334	-1.21216	-1.20088	-1.18954	-1.17923	-1.16784	-1.15643	-1.14005	-1.1287	-1.11729	-1.10582	-1.10016
885.063	-1.22664	-1.21558	-1.20444	-1.19324	-1.18305	-1.1718	-1.16053	-1.14429	-1.13308	-1.12181	-1.11048	-1.10465
886.459	-1.22977	-1.21885	-1.20784	-1.19677	-1.1867	-1.17558	-1.16445	-1.14837	-1.13729	-1.12616	-1.11498	-1.10895
887.855	-1.23275	-1.22195	-1.21107	-1.20013	-1.19018	-1.1792	-1.1682	-1.15228	-1.14134	-1.13034	-1.1193	-1.11306
889.251	-1.23556	-1.22489	-1.21413	-1.20332	-1.19349	-1.18264	-1.17176	-1.15602	-1.14521	-1.13435	-1.12345	-1.11697
890.647	-1.23822	-1.22766	-1.21703	-1.20634	-1.19662	-1.1859	-1.17515	-1.15959	-1.14892	-1.13819	-1.12741	-1.12068
892.043	-1.24071	-1.23027	-1.21976	-1.20919	-1.19958	-1.18898	-1.17836	-1.163	-1.15245	-1.14184	-1.1312	-1.1242
893.439	-1.24304	-1.23272	-1.22232	-1.21187	-1.20237	-1.19189	-1.18139	-1.16624	-1.15581	-1.14533	-1.1348	-1.12751
894.835	-1.24521	-1.235	-1.22471	-1.21438	-1.20499	-1.19462	-1.18424	-1.1693	-1.15899	-1.14863	-1.13823	-1.13064
896.231	-1.24723	-1.23712	-1.22695	-1.21672	-1.20743	-1.19718	-1.18692	-1.1722	-1.162	-1.15176	-1.14147	-1.13357
897.627	-1.24909	-1.23909	-1.22902	-1.2189	-1.20971	-1.19957	-1.18942	-1.17494	-1.16485	-1.15471	-1.14454	-1.13631
899.023	-1.25079	-1.2409	-1.23093	-1.22091	-1.21182	-1.20179	-1.19174	-1.17751	-1.16753	-1.15749	-1.14743	-1.13886
900.419	-1.25236	-1.24256	-1.23269	-1.22277	-1.21377	-1.20384	-1.1939	-1.17992	-1.17004	-1.16011	-1.15015	-1.14123
901.815	-1.25378	-1.24407	-1.2343	-1.22448	-1.21557	-1.20573	-1.19589	-1.18218	-1.17239	-1.16256	-1.1527	-1.14343
903.211	-1.25506	-1.24544	-1.23576	-1.22604	-1.21721	-1.20747	-1.19773	-1.18428	-1.17459	-1.16485	-1.15508	-1.14545
904.607	-1.25621	-1.24668	-1.23708	-1.22745	-1.2187	-1.20906	-1.19941	-1.18624	-1.17663	-1.16699	-1.15731	-1.1473
906.003	-1.25723	-1.24779	-1.23828	-1.22873	-1.22006	-1.21051	-1.20094	-1.18806	-1.17853	-1.16897	-1.15938	-1.149
907.399	-1.25813	-1.24877	-1.23934	-1.22987	-1.22128	-1.21181	-1.20233	-1.18974	-1.18029	-1.17081	-1.1613	-1.15055
908.795	-1.25892	-1.24963	-1.24028	-1.23089	-1.22238	-1.21299	-1.20359	-1.19129	-1.18192	-1.17251	-1.16309	-1.15195
910.191	-1.25961	-1.25039	-1.24111	-1.2318	-1.22335	-1.21404	-1.20472	-1.19271	-1.18342	-1.17409	-1.16473	-1.15322
911.587	-1.26019	-1.25105	-1.24184	-1.23259	-1.22421	-1.21497	-1.20572	-1.19402	-1.1848	-1.17553	-1.16625	-1.15436
912.983	-1.26069	-1.25161	-1.24246	-1.23329	-1.22497	-1.2158	-1.20662	-1.19523	-1.18606	-1.17686	-1.16764	-1.15539
914.379	-1.2611	-1.25208	-1.243	-1.23389	-1.22563	-1.21652	-1.20741	-1.19633	-1.18723	-1.17809	-1.16893	-1.1563
915.775	-1.26144	-1.25248	-1.24346	-1.23441	-1.2262	-1.21716	-1.20811	-1.19734	-1.18829	-1.17921	-1.1701	-1.15712
917.171	-1.26171	-1.2528	-1.24384	-1.23485	-1.22669	-1.21771	-1.20872	-1.19826	-1.18927	-1.18024	-1.17118	-1.15785
918.567	-1.26192	-1.25307	-1.24416	-1.23522	-1.22711	-1.21818	-1.20925	-1.19911	-1.19016	-1.18118	-1.17218	-1.1585
919.963	-1.26209	-1.25328	-1.24442	-1.23553	-1.22747	-1.2186	-1.20971	-1.19989	-1.19099	-1.18205	-1.17309	-1.15907
921.359	-1.26221	-1.25345	-1.24464	-1.2358	-1.22778	-1.21895	-1.21012	-1.20061	-1.19175	-1.18285	-1.17394	-1.15959
922.755	-1.2623	-1.25359	-1.24482	-1.23602	-1.22805	-1.21926	-1.21047	-1.20128	-1.19246	-1.1836	-1.17472	-1.16007
924.151	-1.26237	-1.2537	-1.24497	-1.23621	-1.22828	-1.21954	-1.21079	-1.20191	-1.19312	-1.18429	-1.17545	-1.1605
925.547	-1.26243	-1.2538	-1.2451	-1.23638	-1.22848	-1.21978	-1.21107	-1.2025	-1.19374	-1.18495	-1.17614	-1.16091
926.943	-1.26249	-1.25388	-1.24523	-1.23654	-1.22867	-1.22001	-1.21134	-1.20308	-1.19434	-1.18558	-1.1768	-1.1613
928.339	-1.26254	-1.25397	-1.24535	-1.2367	-1.22886	-1.22023	-1.21159	-1.20363	-1.19492	-1.18618	-1.17743	-1.16168
929.735	-1.26261	-1.25407	-1.24548	-1.23686	-1.22905	-1.22044	-1.21184	-1.20418	-1.19549	-1.18677	-1.17804	-1.16207
931.131	-1.26271	-1.25419	-1.24562	-1.23703	-1.22925	-1.22067	-1.21209	-1.20473	-1.19606	-1.18736	-1.17865	-1.16247
932.527	-1.26283	-1.25434	-1.2458	-1.23723	-1.22947	-1.22092	-1.21237	-1.20529	-1.19664	-1.18796	-1.17926	-1.16289
933.923	-1.26299	-1.25452	-1.246	-1.23746	-1.22972	-1.22119	-1.21266	-1.20587	-1.19723	-1.18857	-1.17989	-1.16334
935.319	-1.26319	-1.25475	-1.24625	-1.23773	-1.23	-1.2215	-1.21299	-1.20647	-1.19785	-1.1892	-1.18053	-1.16384
936.715	-1.26345	-1.25502	-1.24655	-1.23804	-1.23034	-1.22185	-1.21337	-1.20711	-1.1985	-1.18986	-1.18121	-1.16439
938.111	-1.26377	-1.25536	-1.2469	-1.23841	-1.23073	-1.22226	-1.21379	-1.20779	-1.19919	-1.19056	-1.18192	-1.165
939.507	-1.26416	-1.25577	-1.24732	-1.23885	-1.23118	-1.22273	-1.21427	-1.20852	-1.19993	-1.19131	-1.18267	-1.16567
940.903	-1.26462	-1.25624	-1.24781	-1.23936	-1.2317	-1.22326	-1.21482	-1.20931	-1.20073	-1.19211	-1.18348	-1.16643
942.299	-1.26517	-1.2568	-1.24838	-1.23994	-1.23229	-1.22387	-1.21544	-1.21016	-1.20158	-1.19298	-1.18435	-1.16727
943.695	-1.2658	-1.25745	-1.24904	-1.24061	-1.23297	-1.22456	-1.21615	-1.21109	-1.20251	-1.19391	-1.18529	-1.1682
945.091	-1.26653	-1.25818	-1.24979	-1.24137	-1.23374	-1.22534	-1.21694	-1.21209	-1.20351	-1.19492	-1.1863	-1.16923
946.487	-1.26735	-1.25902	-1.25064	-1.24223	-1.23461	-1.22622	-1.21782	-1.21317	-1.2046	-1.196	-1.18739	-1.17037
947.883	-1.26828	-1.25996	-1.25159	-1.24319	-1.23558	-1.22719	-1.21881	-1.21434	-1.20577	-1.19718	-1.18856	-1.17162
949.279	-1.26932	-1.26101	-1.25265	-1.24426	-1.23665	-1.22827	-1.2199	-1.2156	-1.20704	-1.19845	-1.18983	-1.17298
950.675	-1.27048	-1.26217	-1.25382	-1.24544	-1.23784	-1.22947	-1.2211	-1.21697	-1.2084	-1.19981	-1.1912	-1.17447
952.071	-1.27175	-1.26345	-1.2551	-1.24673	-1.23914	-1.23078	-1.22241	-1.21843	-1.20987	-1.20128	-1.19267	-1.17609
953.467	-1.27314	-1.26485	-1.25651	-1.24815	-1.24056	-1.23221	-1.22385	-1.22	-1.21145	-1.20286	-1.19425	-1.17784
954.863	-1.27466	-1.26638	-1.25805	-1.24969	-1.24211	-1.23376	-1.22541	-1.22169	-1.21313	-1.20455	-1.19593	-1.17973
956.259	-1.2763	-1.26803	-1.25971	-1.25135	-1.24378	-1.23544	-1.22709	-1.22348	-1.21493	-1.20635	-1.19774	-1.18175
957.655	-1.27807	-1.26981	-1.26149	-1.25315	-1.24558	-1.23725	-1.22891	-1.22539	-1.21684	-1.20826	-1.19966	-1.18392
959.051	-1.27998	-1.27172	-1.26341	-1.25508	-1.24752	-1.23919	-1.23086	-1.22742	-1.21888	-1.2103	-1.2017	-1.18623
960.447	-1.28201	-1.27376	-1.26547	-1.25714	-1.24959	-1.24127	-1.23294	-1.22957	-1.22103	-1.21246	-1.20387	-1.18869
961.843	-1.28418	-1.27594	-1.26765	-1.25934	-1.25179	-1.24348	-1.23516	-1.23185	-1.22331	-1.21475	-1.20616	-1.19129
963.239	-1.28648	-1.27825	-1.26997	-1.26167	-1.25413	-1.24583	-1.23752	-1.23424	-1.22571	-1.21716	-1.20857	-1.19404
964.635	-1.28891	-1.28069	-1.27243	-1.26413	-1.2566	-1.24831	-1.24001	-1.23676	-1.22824	-1.21969	-1.21111	-1.19694
966.031	-1.29148	-1.28327	-1.27502	-1.26674	-1.25921	-1.25093	-1.24264	-1.2394	-1.23089	-1.22235	-1.21378	-1.19999
967.427	-1.29417	-1.28598	-1.27774	-1.26947	-1.26196	-1.25369	-1.24541	-1.24217	-1.23367	-1.22514	-1.21658	-1.20318
968.823	-1.297	-1.28882	-1.2806	-1.27234	-1.26484	-1.25658	-1.24832	-1.24505	-1.23657	-1.22805	-1.21951	-1.20652
970.219	-1.29996	-1.29179	-1.28358	-1.27534	-1.26786	-1.25961	-1.25136	-1.24806	-1.23959	-1.23109	-1.22256	-1.21
971.615	-1.30304	-1.29489	-1.2867	-1.27847	-1.271	-1.26277	-1.25453	-1.25119	-1.24274	-1.23426	-1.22574	-1.21362
973.011	-1.30624	-1.29812	-1.28994	-1.28173	-1.27427	-1.26606	-1.25783	-1.25444	-1.246	-1.23754	-1.22904	-1.21738
974.407	-1.30957	-1.30146	-1.2933	-1.28511	-1.27767	-1.26948	-1.26127	-1.2578	-1.24938	-1.24094	-1.23246	-1.22127
975.803	-1.31301	-1.30492	-1.29679	-1.28862	-1.28119	-1.27302	-1.26483	-1.26127	-1.25288	-1.24446	-1.236	-1.22529
977.199	-1.31657	-1.3085	-1.30039	-1.29224	-1.28483	-1.27668	-1.26851	-1.26486	-1.25649	-1.24809	-1.23966	-1.22944
978.595	-1.32023	-1.31219	-1.3041	-1.29597	-1.28859	-1.28045	-1.27231	-1.26855	-1.26021	-1.25184	-1.24343	-1.23371
979.991	-1.324	-1.31598	-1.30792	-1.29982	-1.29246	-1.28435	-1.27622	-1.27234	-1.26403	-1.25569	-1.24731	-1.2381
981.387	-1.32787	-1.31988	-1.31184	-1.30377	-1.29643	-1.28834	-1.28025	-1.27623	-1.26795	-1.25964	-1.25129	-1.2426
982.783	-1.33183	-1.32387	-1.31586	-1.30782	-1.3005	-1.29244	-1.28438	-1.28022	-1.27197	-1.26369	-1.25538	-1.24721
984.179	-1.33588	-1.32795	-1.31997	-1.31196	-1.30467	-1.29664	-1.2886	-1.28429	-1.27608	-1.26783	-1.25955	-1.25191
985.575	-1.34002	-1.33212	-1.32417	-1.31619	-1.30893	-1.30093	-1.29292	-1.28845	-1.28027	-1.27207	-1.26382	-1.25671
986.971	-1.34423	-1.33636	-1.32845	-1.3205	-1.31327	-1.30531	-1.29733	-1.29268	-1.28454	-1.27638	-1.26818	-1.26159
988.367	-1.34851	-1.34068	-1.3328	-1.32489	-1.31769	-1.30976	-1.30182	-1.29699	-1.2889	-1.28077	-1.27261	-1.26655
989.763	-1.35286	-1.34506	-1.33722	-1.32935	-1.32219	-1.31429	-1.30639	-1.30136	-1.29331	-1.28524	-1.27712	-1.27158
991.159	-1.35726	-1.3495	-1.34171	-1.33387	-1.32674	-1.31889	-1.31102	-1.3058	-1.2978	-1.28977	-1.2817	-1.27667
992.555	-1.36171	-1.354	-1.34624	-1.33845	-1.33136	-1.32354	-1.31572	-1.31029	-1.30233	-1.29435	-1.28633	-1.28182
993.951	-1.36621	-1.35854	-1.35082	-1.34308	-1.33602	-1.32825	-1.32046	-1.31483	-1.30692	-1.29899	-1.29102	-1.28702
995.347	-1.37074	-1.36312	-1.35545	-1.34774	-1.34073	-1.333	-1.32526	-1.3194	-1.31155	-1.30368	-1.29576	-1.29225
996.743	-1.37531	-1.36773	-1.3601	-1.35244	-1.34547	-1.33779	-1.33009	-1.32402	-1.31622	-1.3084	-1.30054	-1.29752
998.139	-1.37989	-1.37236	-1.36478	-1.35717	-1.35024	-1.34261	-1.33496	-1.32866	-1.32092	-1.31316	-1.30536	-1.3028
999.535	-1.38449	-1.377	-1.36948	-1.36192	-1.35503	-1.34745	-1.33985	-1.33332	-1.32564	-1.31794	-1.31019	-1.30811
1000.93	-1.38909	-1.38166	-1.37418	-1.36668	-1.35984	-1.3523	-1.34476	-1.33799	-1.33038	-1.32273	-1.31505	-1.31341
1002.33	-1.39369	-1.38631	-1.37889	-1.37144	-1.36464	-1.35716	-1.34967	-1.34267	-1.33512	-1.32754	-1.31992	-1.31871
1003.72	-1.39829	-1.39096	-1.38359	-1.37619	-1.36945	-1.36202	-1.35458	-1.34735	-1.33986	-1.33235	-1.3248	-1.324
1005.12	-1.40286	-1.39559	-1.38828	-1.38094	-1.37424	-1.36687	-1.35949	-1.35203	-1.3446	-1.33715	-1.32967	-1.32926
1006.51	-1.40741	-1.4002	-1.39295	-1.38566	-1.37902	-1.3717	-1.36438	-1.35668	-1.34933	-1.34195	-1.33453	-1.3345
1007.91	-1.41194	-1.40478	-1.39758	-1.39035	-1.38377	-1.37651	-1.36925	-1.36132	-1.35403	-1.34672	-1.33938	-1.3397
1009.31	-1.41642	-1.40932	-1.40218	-1.39501	-1.38848	-1.38129	-1.37408	-1.36592	-1.35871	-1.35147	-1.3442	-1.34485
1010.7	-1.42085	-1.41381	-1.40674	-1.39963	-1.39316	-1.38602	-1.37888	-1.37049	-1.36335	-1.35618	-1.34898	-1.34994
1012.1	-1.42523	-1.41825	-1.41124	-1.4042	-1.39778	-1.39071	-1.38363	-1.37502	-1.36795	-1.36085	-1.35373	-1.35497
1013.49	-1.42955	-1.42264	-1.41569	-1.40871	-1.40234	-1.39534	-1.38832	-1.3795	-1.3725	-1.36548	-1.35843	-1.35993
1014.89	-1.43381	-1.42695	-1.42007	-1.41315	-1.40685	-1.3999	-1.39295	-1.38392	-1.37699	-1.37005	-1.36307	-1.36481
1016.29	-1.43799	-1.4312	-1.42438	-1.41753	-1.41128	-1.4044	-1.39752	-1.38827	-1.38142	-1.37456	-1.36766	-1.3696
1017.68	-1.44209	-1.43536	-1.42861	-1.42182	-1.41563	-1.40882	-1.402	-1.39256	-1.38579	-1.379	-1.37218	-1.37429
1019.08	-1.4461	-1.43944	-1.43275	-1.42603	-1.4199	-1.41316	-1.40641	-1.39678	-1.39008	-1.38337	-1.37662	-1.37889
1020.47	-1.45002	-1.44343	-1.4368	-1.43015	-1.42408	-1.41741	-1.41072	-1.40091	-1.39429	-1.38765	-1.38099	-1.38337
1021.87	-1.45384	-1.44731	-1.44076	-1.43417	-1.42817	-1.42156	-1.41494	-1.40496	-1.39841	-1.39185	-1.38527	-1.38775
1023.27	-1.45756	-1.4511	-1.44461	-1.43809	-1.43215	-1.42561	-1.41906	-1.40891	-1.40244	-1.39596	-1.38946	-1.392
1024.66	-1.46117	-1.45478	-1.44835	-1.4419	-1.43602	-1.42955	-1.42307	-1.41277	-1.40638	-1.39998	-1.39355	-1.39612
1026.06	-1.46467	-1.45834	-1.45198	-1.4456	-1.43978	-1.43338	-1.42697	-1.41653	-1.41021	-1.40389	-1.39754	-1.40012
1027.45	-1.46805	-1.46179	-1.4555	-1.44918	-1.44342	-1.43709	-1.43075	-1.42018	-1.41394	-1.40769	-1.40142	-1.40397
1028.85	-1.47131	-1.46511	-1.45889	-1.45264	-1.44694	-1.44068	-1.43441	-1.42372	-1.41756	-1.41138	-1.40519	-1.40769
1030.25	-1.47444	-1.46831	-1.46215	-1.45597	-1.45034	-1.44414	-1.43794	-1.42715	-1.42106	-1.41496	-1.40885	-1.41126
1031.64	-1.47745	-1.47138	-1.46529	-1.45918	-1.4536	-1.44747	-1.44134	-1.43046	-1.42445	-1.41842	-1.41238	-1.41468
1033.04	-1.48032	-1.47432	-1.46829	-1.46225	-1.45673	-1.45067	-1.44461	-1.43365	-1.42771	-1.42176	-1.4158	-1.41795
1034.43	-1.48306	-1.47713	-1.47117	-1.46518	-1.45973	-1.45373	-1.44774	-1.43672	-1.43085	-1.42497	-1.41908	-1.42107
1035.83	-1.48567	-1.47979	-1.4739	-1.46798	-1.46259	-1.45666	-1.45073	-1.43966	-1.43387	-1.42806	-1.42224	-1.42403
1037.23	-1.48814	-1.48232	-1.47649	-1.47064	-1.46531	-1.45944	-1.45357	-1.44248	-1.43675	-1.43101	-1.42527	-1.42683
1038.62	-1.49047	-1.48472	-1.47894	-1.47315	-1.46788	-1.46208	-1.45628	-1.44517	-1.43951	-1.43384	-1.42816	-1.42948
1040.02	-1.49266	-1.48697	-1.48126	-1.47553	-1.47031	-1.46457	-1.45884	-1.44772	-1.44213	-1.43653	-1.43092	-1.43196
1041.41	-1.49471	-1.48908	-1.48343	-1.47776	-1.4726	-1.46692	-1.46125	-1.45015	-1.44462	-1.43908	-1.43354	-1.43428
1042.81	-1.49662	-1.49105	-1.48545	-1.47985	-1.47474	-1.46913	-1.46351	-1.45244	-1.44698	-1.4415	-1.43603	-1.43644
1044.21	-1.49839	-1.49287	-1.48734	-1.48179	-1.47674	-1.47118	-1.46563	-1.4546	-1.4492	-1.44379	-1.43838	-1.43845
1045.6	-1.50002	-1.49456	-1.48908	-1.48359	-1.47859	-1.4731	-1.4676	-1.45664	-1.45129	-1.44594	-1.44059	-1.44029
1047	-1.50151	-1.49611	-1.49069	-1.48525	-1.4803	-1.47486	-1.46943	-1.45854	-1.45325	-1.44796	-1.44266	-1.44198
1048.39	-1.50287	-1.49752	-1.49215	-1.48677	-1.48187	-1.47649	-1.47111	-1.46031	-1.45508	-1.44984	-1.4446	-1.44352
1049.79	-1.5041	-1.4988	-1.49348	-1.48815	-1.4833	-1.47797	-1.47264	-1.46195	-1.45677	-1.45159	-1.4464	-1.4449
