# Supplementary material
Source: Royal Society of Chemistry journal article supplement (doi:10.1039/d5an01287b)
Supplement: d5an01287b2.xlsx [file d5an01287b2.xlsx]

## Sheet: Sheet1
FF	S1	S2	S3	S4	S5	S6	S7	S8	S9	S10	S11	S12
499.767	-0.382621	-0.380614	-0.378531	-0.376442	-0.374525	-0.372539	-0.370433	-0.36801	-0.365851	-0.363672	-0.361534	-0.355775
501.163	-0.385599	-0.383591	-0.381506	-0.379418	-0.377501	-0.375513	-0.373408	-0.370948	-0.368782	-0.366596	-0.364451	-0.358381
502.559	-0.38862	-0.386613	-0.384529	-0.382442	-0.380525	-0.378539	-0.376435	-0.37394	-0.371768	-0.369576	-0.367424	-0.361042
503.955	-0.39168	-0.389673	-0.387592	-0.385506	-0.383592	-0.381607	-0.379506	-0.376978	-0.374801	-0.372603	-0.370447	-0.363751
505.351	-0.394768	-0.392765	-0.390686	-0.388604	-0.386692	-0.384711	-0.382614	-0.380053	-0.377872	-0.375671	-0.373511	-0.366498
506.747	-0.397878	-0.395879	-0.393805	-0.391727	-0.38982	-0.387843	-0.385751	-0.383158	-0.380974	-0.37877	-0.376608	-0.36928
508.143	-0.401004	-0.399009	-0.39694	-0.394867	-0.392966	-0.390994	-0.388908	-0.386285	-0.384099	-0.381894	-0.37973	-0.372086
509.539	-0.404136	-0.402147	-0.400085	-0.398017	-0.396121	-0.394157	-0.392078	-0.389425	-0.387238	-0.385032	-0.382867	-0.374909
510.935	-0.407269	-0.405286	-0.403229	-0.401169	-0.399279	-0.397323	-0.395251	-0.39257	-0.390383	-0.388177	-0.386013	-0.377742
512.331	-0.410393	-0.408417	-0.406367	-0.404314	-0.402432	-0.400483	-0.398421	-0.395711	-0.393524	-0.391319	-0.389156	-0.380578
513.727	-0.413501	-0.411532	-0.40949	-0.407445	-0.40557	-0.40363	-0.401576	-0.39884	-0.396655	-0.394451	-0.392289	-0.383406
515.123	-0.416587	-0.414623	-0.41259	-0.410553	-0.408686	-0.406754	-0.404711	-0.401949	-0.399765	-0.397563	-0.395403	-0.386221
516.519	-0.41964	-0.417685	-0.41566	-0.41363	-0.411771	-0.40985	-0.407815	-0.405029	-0.402847	-0.400646	-0.398489	-0.389013
517.915	-0.422656	-0.420708	-0.41869	-0.416671	-0.414818	-0.412906	-0.410882	-0.408073	-0.405892	-0.403693	-0.401538	-0.391774
519.311	-0.425627	-0.423685	-0.421676	-0.419664	-0.41782	-0.415916	-0.413902	-0.411069	-0.40889	-0.406694	-0.404541	-0.394497
520.707	-0.428544	-0.42661	-0.424607	-0.422603	-0.420767	-0.418873	-0.416867	-0.414012	-0.411835	-0.409641	-0.407491	-0.397175
522.103	-0.431402	-0.429475	-0.427478	-0.425481	-0.423653	-0.421767	-0.419771	-0.416893	-0.414718	-0.412526	-0.410379	-0.399798
523.499	-0.434193	-0.432271	-0.430282	-0.428291	-0.426469	-0.424591	-0.422605	-0.419705	-0.417531	-0.415341	-0.413195	-0.40236
524.895	-0.436913	-0.434995	-0.433011	-0.431026	-0.42921	-0.427339	-0.42536	-0.422441	-0.420266	-0.418077	-0.415933	-0.404854
526.291	-0.439553	-0.437638	-0.435659	-0.433679	-0.431868	-0.430003	-0.42803	-0.425091	-0.422916	-0.420728	-0.418585	-0.407272
527.687	-0.442108	-0.440197	-0.438219	-0.436243	-0.434436	-0.432575	-0.430609	-0.42765	-0.425475	-0.423285	-0.421142	-0.409606
529.083	-0.444573	-0.442663	-0.440687	-0.438713	-0.436909	-0.435052	-0.43309	-0.430111	-0.427934	-0.425743	-0.423599	-0.411852
530.479	-0.446944	-0.445032	-0.443057	-0.441083	-0.439281	-0.437427	-0.435466	-0.432469	-0.430288	-0.428093	-0.425948	-0.414001
531.875	-0.449214	-0.447301	-0.445324	-0.443348	-0.441545	-0.439692	-0.437733	-0.434715	-0.43253	-0.430331	-0.428182	-0.416049
533.271	-0.451381	-0.449462	-0.447481	-0.445503	-0.443698	-0.441843	-0.439884	-0.436847	-0.434654	-0.43245	-0.430296	-0.41799
534.667	-0.453439	-0.451514	-0.449528	-0.447543	-0.445736	-0.443877	-0.441915	-0.438858	-0.436657	-0.434447	-0.432285	-0.419818
536.063	-0.455387	-0.453454	-0.451459	-0.449467	-0.447653	-0.445789	-0.443821	-0.440744	-0.438533	-0.436312	-0.434143	-0.42153
537.459	-0.457221	-0.455277	-0.45327	-0.451269	-0.449446	-0.447573	-0.445599	-0.442501	-0.440278	-0.438046	-0.435865	-0.423119
538.855	-0.45894	-0.456981	-0.454962	-0.452947	-0.451113	-0.44923	-0.447246	-0.444125	-0.441888	-0.439642	-0.437449	-0.424584
540.251	-0.460542	-0.458565	-0.45653	-0.454499	-0.452653	-0.450756	-0.448758	-0.445615	-0.443361	-0.441098	-0.43889	-0.425922
541.647	-0.462024	-0.460029	-0.457973	-0.455924	-0.454061	-0.452147	-0.450133	-0.446967	-0.444693	-0.442412	-0.440186	-0.427127
543.043	-0.463389	-0.46137	-0.459292	-0.45722	-0.455339	-0.453405	-0.451373	-0.448181	-0.445884	-0.443581	-0.441334	-0.4282
544.439	-0.464635	-0.462589	-0.460486	-0.458388	-0.456484	-0.454527	-0.452472	-0.449254	-0.446932	-0.444605	-0.442335	-0.429139
545.835	-0.465764	-0.463688	-0.461554	-0.459428	-0.457499	-0.455515	-0.453434	-0.450188	-0.447837	-0.445482	-0.443186	-0.429942
547.231	-0.466777	-0.464668	-0.4625	-0.460341	-0.458383	-0.456369	-0.454257	-0.450982	-0.4486	-0.446213	-0.443887	-0.430611
548.627	-0.467677	-0.46553	-0.463326	-0.461129	-0.459139	-0.457089	-0.454945	-0.451638	-0.449221	-0.4468	-0.44444	-0.431144
550.023	-0.468468	-0.466278	-0.464032	-0.461795	-0.459768	-0.45768	-0.455498	-0.452158	-0.449701	-0.447243	-0.444845	-0.431545
551.419	-0.469152	-0.466916	-0.464624	-0.462341	-0.460275	-0.458144	-0.455919	-0.452544	-0.450045	-0.447544	-0.445106	-0.431814
552.815	-0.469734	-0.467447	-0.465106	-0.462772	-0.460663	-0.458485	-0.456213	-0.4528	-0.450254	-0.447708	-0.445224	-0.431954
554.211	-0.470218	-0.467877	-0.465481	-0.463094	-0.460937	-0.458707	-0.456384	-0.45293	-0.450334	-0.447738	-0.445205	-0.431969
555.607	-0.470613	-0.468213	-0.465758	-0.463311	-0.461102	-0.458816	-0.456437	-0.452939	-0.450289	-0.447638	-0.445052	-0.431863
557.003	-0.470924	-0.46846	-0.465939	-0.46343	-0.461164	-0.458817	-0.456377	-0.452834	-0.450123	-0.447414	-0.444771	-0.43164
558.399	-0.471158	-0.468625	-0.466036	-0.463458	-0.461131	-0.458718	-0.456213	-0.452619	-0.449845	-0.447074	-0.444368	-0.431308
559.795	-0.471325	-0.468717	-0.466054	-0.463403	-0.461011	-0.458526	-0.45595	-0.452305	-0.449463	-0.446623	-0.44385	-0.43087
561.191	-0.471431	-0.468745	-0.466003	-0.463274	-0.460811	-0.45825	-0.455598	-0.451898	-0.448982	-0.44607	-0.443227	-0.430336
562.587	-0.471489	-0.468718	-0.465892	-0.463079	-0.460541	-0.457899	-0.455167	-0.451406	-0.448413	-0.445423	-0.442503	-0.429714
563.983	-0.471508	-0.468648	-0.465733	-0.46283	-0.460212	-0.457483	-0.454664	-0.450841	-0.447765	-0.444693	-0.441693	-0.429011
565.379	-0.471499	-0.468544	-0.465534	-0.462537	-0.459835	-0.457013	-0.454103	-0.450212	-0.447049	-0.443889	-0.440802	-0.428239
566.775	-0.471473	-0.468419	-0.465309	-0.462212	-0.459421	-0.456501	-0.453493	-0.449532	-0.446275	-0.443024	-0.439845	-0.427407
568.171	-0.471445	-0.468285	-0.46507	-0.461867	-0.458982	-0.455958	-0.452849	-0.448812	-0.445457	-0.442108	-0.438832	-0.426526
569.567	-0.471426	-0.468156	-0.46483	-0.461517	-0.458531	-0.455399	-0.452181	-0.448064	-0.444607	-0.441154	-0.437777	-0.425608
570.963	-0.471432	-0.468044	-0.464602	-0.461172	-0.458083	-0.454837	-0.451504	-0.447305	-0.443737	-0.440177	-0.436693	-0.424666
572.359	-0.471477	-0.467968	-0.464402	-0.460851	-0.457652	-0.454286	-0.450834	-0.446546	-0.442864	-0.439191	-0.435593	-0.423713
573.755	-0.471576	-0.467939	-0.464247	-0.460567	-0.457253	-0.453761	-0.450184	-0.445802	-0.442002	-0.438209	-0.434493	-0.422763
575.151	-0.471744	-0.467975	-0.464149	-0.460337	-0.456902	-0.453279	-0.44957	-0.445091	-0.441166	-0.437248	-0.433409	-0.421832
576.547	-0.471999	-0.468091	-0.464126	-0.460175	-0.456615	-0.452855	-0.449011	-0.444428	-0.440373	-0.436325	-0.432356	-0.420934
577.943	-0.472358	-0.468306	-0.464197	-0.460101	-0.456411	-0.452508	-0.448521	-0.443831	-0.439638	-0.435456	-0.431352	-0.420086
579.339	-0.472838	-0.468637	-0.464377	-0.460131	-0.456306	-0.452255	-0.44812	-0.443315	-0.438983	-0.43466	-0.430416	-0.419304
580.735	-0.473458	-0.469102	-0.464687	-0.460285	-0.456319	-0.452113	-0.447825	-0.442903	-0.438424	-0.433953	-0.429563	-0.418607
582.131	-0.474236	-0.469719	-0.465144	-0.460581	-0.45647	-0.452103	-0.447655	-0.442609	-0.437978	-0.433357	-0.428814	-0.418011
583.527	-0.475192	-0.47051	-0.465767	-0.461037	-0.456776	-0.452245	-0.447631	-0.442457	-0.437667	-0.432888	-0.428189	-0.417536
584.923	-0.476346	-0.471492	-0.466578	-0.461676	-0.457258	-0.452555	-0.447772	-0.442464	-0.437511	-0.432569	-0.427706	-0.4172
586.319	-0.477718	-0.472687	-0.467596	-0.462515	-0.457937	-0.453058	-0.448098	-0.44265	-0.43753	-0.432418	-0.427388	-0.417024
587.715	-0.479328	-0.474116	-0.468841	-0.463578	-0.458834	-0.453773	-0.448632	-0.443039	-0.437743	-0.432458	-0.427254	-0.417028
589.111	-0.481198	-0.475798	-0.470336	-0.464885	-0.45997	-0.454722	-0.449393	-0.443649	-0.438175	-0.43271	-0.427328	-0.417233
590.507	-0.483348	-0.477756	-0.472101	-0.466456	-0.461366	-0.455925	-0.450404	-0.444503	-0.438845	-0.433196	-0.427628	-0.417659
591.903	-0.485802	-0.480013	-0.474159	-0.468315	-0.463045	-0.457406	-0.451688	-0.445626	-0.439777	-0.433938	-0.428181	-0.418328
593.299	-0.488581	-0.482589	-0.476532	-0.470484	-0.465029	-0.459188	-0.453266	-0.447036	-0.440993	-0.434959	-0.429006	-0.419262
594.695	-0.491708	-0.485509	-0.479243	-0.472986	-0.467342	-0.461292	-0.455162	-0.44876	-0.442516	-0.436282	-0.430128	-0.420484
596.091	-0.495205	-0.488793	-0.482314	-0.475844	-0.470006	-0.463742	-0.4574	-0.450818	-0.444369	-0.43793	-0.43157	-0.422016
597.487	-0.499094	-0.492466	-0.485769	-0.47908	-0.473044	-0.466562	-0.460002	-0.453236	-0.446578	-0.439926	-0.433357	-0.423883
598.883	-0.503401	-0.496551	-0.489632	-0.482719	-0.47648	-0.469776	-0.462992	-0.456037	-0.449163	-0.442297	-0.435511	-0.426106
600.279	-0.508148	-0.501072	-0.493926	-0.486784	-0.480339	-0.473406	-0.466395	-0.459244	-0.452151	-0.445064	-0.438058	-0.42871
601.675	-0.513359	-0.506052	-0.498673	-0.4913	-0.484644	-0.477478	-0.470235	-0.462884	-0.455565	-0.448253	-0.441022	-0.431719
603.071	-0.519056	-0.511516	-0.503901	-0.49629	-0.489418	-0.482016	-0.474537	-0.466978	-0.459431	-0.451889	-0.444427	-0.435156
604.467	-0.525266	-0.517486	-0.509631	-0.501778	-0.494687	-0.487045	-0.479323	-0.471554	-0.463772	-0.455996	-0.448299	-0.439047
605.863	-0.532012	-0.523988	-0.515888	-0.507792	-0.500477	-0.492589	-0.484622	-0.476635	-0.468614	-0.460599	-0.452663	-0.443416
607.259	-0.539318	-0.531047	-0.522698	-0.514352	-0.50681	-0.498672	-0.490456	-0.482245	-0.473983	-0.465724	-0.457544	-0.448287
608.655	-0.547207	-0.538685	-0.530084	-0.521484	-0.513712	-0.50532	-0.496851	-0.488412	-0.479902	-0.471396	-0.462967	-0.453686
610.051	-0.555705	-0.546929	-0.538072	-0.529213	-0.521208	-0.512559	-0.503832	-0.495159	-0.486398	-0.47764	-0.468959	-0.459639
611.447	-0.564838	-0.555802	-0.546685	-0.537566	-0.529323	-0.520412	-0.511423	-0.502512	-0.493496	-0.484481	-0.475543	-0.466168
612.843	-0.574628	-0.56533	-0.555948	-0.546565	-0.538081	-0.528905	-0.519651	-0.510496	-0.501221	-0.491946	-0.482747	-0.473301
614.239	-0.585101	-0.575537	-0.565888	-0.556236	-0.547508	-0.538064	-0.52854	-0.519137	-0.509599	-0.500059	-0.490596	-0.481062
615.635	-0.59628	-0.586448	-0.576528	-0.566605	-0.557629	-0.547913	-0.538117	-0.528459	-0.518654	-0.508847	-0.499115	-0.489477
617.031	-0.608191	-0.598087	-0.587893	-0.577695	-0.56847	-0.558477	-0.548406	-0.538488	-0.528412	-0.518334	-0.50833	-0.498572
618.427	-0.62086	-0.610479	-0.600009	-0.589533	-0.580053	-0.569782	-0.559432	-0.549251	-0.538901	-0.528547	-0.518266	-0.508371
619.823	-0.634308	-0.623649	-0.612899	-0.602142	-0.592407	-0.581853	-0.571221	-0.560771	-0.550143	-0.539511	-0.528951	-0.518902
621.219	-0.648563	-0.637623	-0.626589	-0.615548	-0.605555	-0.594716	-0.583798	-0.573075	-0.562166	-0.551251	-0.540408	-0.530188
622.615	-0.663648	-0.652424	-0.641104	-0.629776	-0.619521	-0.608395	-0.597189	-0.586188	-0.574995	-0.563794	-0.552665	-0.542256
624.011	-0.679588	-0.668076	-0.65647	-0.644851	-0.634331	-0.622915	-0.611418	-0.600134	-0.588654	-0.577165	-0.565745	-0.555131
625.407	-0.696407	-0.684607	-0.672708	-0.660798	-0.650012	-0.638302	-0.626511	-0.61494	-0.603169	-0.591389	-0.579676	-0.568839
626.803	-0.71413	-0.702038	-0.689846	-0.677641	-0.666586	-0.65458	-0.642494	-0.630631	-0.618566	-0.60649	-0.594482	-0.583405
628.199	-0.732782	-0.720395	-0.707907	-0.695405	-0.68408	-0.671775	-0.659389	-0.647231	-0.63487	-0.622497	-0.61019	-0.598854
629.595	-0.752387	-0.739703	-0.726917	-0.714116	-0.702515	-0.689911	-0.677225	-0.664766	-0.652106	-0.639433	-0.626823	-0.615213
630.991	-0.772969	-0.759986	-0.7469	-0.733797	-0.721921	-0.709013	-0.696024	-0.683261	-0.670299	-0.657322	-0.644409	-0.632505
632.387	-0.794553	-0.781269	-0.76788	-0.754473	-0.74232	-0.729107	-0.715812	-0.702741	-0.689475	-0.676192	-0.662972	-0.650758
633.783	-0.817162	-0.803575	-0.789882	-0.776169	-0.763738	-0.750216	-0.736614	-0.723231	-0.709658	-0.696067	-0.682537	-0.669996
635.179	-0.840821	-0.82693	-0.812929	-0.79891	-0.786197	-0.772367	-0.758454	-0.744756	-0.730873	-0.716971	-0.703128	-0.690245
636.575	-0.865554	-0.851357	-0.837049	-0.822718	-0.809723	-0.795582	-0.781359	-0.76734	-0.753145	-0.73893	-0.724773	-0.711529
637.971	-0.891387	-0.876881	-0.862262	-0.847622	-0.834341	-0.819887	-0.80535	-0.791009	-0.776501	-0.76197	-0.747496	-0.733874
639.367	-0.918341	-0.903526	-0.888596	-0.873642	-0.860076	-0.845307	-0.830454	-0.815787	-0.800962	-0.786114	-0.771321	-0.757305
640.763	-0.946443	-0.931316	-0.916073	-0.900805	-0.88695	-0.871866	-0.856695	-0.841698	-0.826555	-0.811387	-0.796273	-0.781847
642.159	-0.975716	-0.960275	-0.944718	-0.929133	-0.914991	-0.899587	-0.884099	-0.868768	-0.853305	-0.837815	-0.822378	-0.807526
643.555	-1.00618	-0.990428	-0.974555	-0.958653	-0.944219	-0.928497	-0.912689	-0.897021	-0.881237	-0.865422	-0.849659	-0.834367
644.951	-1.03787	-1.0218	-1.00561	-0.989388	-0.974662	-0.958619	-0.942489	-0.926482	-0.910373	-0.894233	-0.878143	-0.862394
646.347	-1.0708	-1.05441	-1.0379	-1.02136	-1.00634	-0.989977	-0.973525	-0.957175	-0.940741	-0.924273	-0.907853	-0.891632
647.743	-1.105	-1.08829	-1.07146	-1.0546	-1.03929	-1.0226	-1.00582	-0.989125	-0.972363	-0.955566	-0.938815	-0.922108
649.139	-1.14048	-1.12346	-1.10631	-1.08912	-1.07352	-1.0565	-1.0394	-1.02236	-1.00527	-0.988138	-0.971055	-0.953846
650.535	-1.17729	-1.15994	-1.14247	-1.12496	-1.10906	-1.09172	-1.07429	-1.05689	-1.03947	-1.02201	-1.00459	-0.986871
651.931	-1.21543	-1.19776	-1.17997	-1.16214	-1.14593	-1.12827	-1.11051	-1.09276	-1.07501	-1.05721	-1.03946	-1.02121
653.327	-1.25494	-1.23695	-1.21883	-1.20067	-1.18417	-1.16618	-1.14809	-1.12999	-1.1119	-1.09377	-1.07568	-1.05688
654.723	-1.29583	-1.27752	-1.25907	-1.24059	-1.22379	-1.20547	-1.18705	-1.16859	-1.15017	-1.1317	-1.11327	-1.09392
656.119	-1.33814	-1.3195	-1.30073	-1.28192	-1.26482	-1.24617	-1.22742	-1.2086	-1.18984	-1.17103	-1.15226	-1.13234
657.515	-1.38188	-1.36292	-1.34382	-1.32469	-1.30729	-1.2883	-1.26923	-1.25004	-1.23094	-1.21179	-1.19268	-1.17218
658.911	-1.42709	-1.4078	-1.38838	-1.36891	-1.35121	-1.33189	-1.31248	-1.29293	-1.27349	-1.25401	-1.23455	-1.21346
660.307	-1.47378	-1.45417	-1.43442	-1.41462	-1.39661	-1.37697	-1.35723	-1.3373	-1.31753	-1.2977	-1.2779	-1.25621
661.703	-1.52198	-1.50204	-1.48196	-1.46184	-1.44353	-1.42355	-1.40347	-1.38318	-1.36306	-1.34289	-1.32274	-1.30044
663.099	-1.57172	-1.55146	-1.53105	-1.51059	-1.49198	-1.47167	-1.45125	-1.43059	-1.41013	-1.38961	-1.36912	-1.34619
664.495	-1.62302	-1.60243	-1.58169	-1.5609	-1.54199	-1.52134	-1.50059	-1.47956	-1.45875	-1.43788	-1.41704	-1.39348
665.891	-1.67591	-1.65499	-1.63392	-1.6128	-1.59358	-1.5726	-1.55151	-1.5301	-1.50895	-1.48774	-1.46655	-1.44235
667.287	-1.73041	-1.70916	-1.68776	-1.66631	-1.64678	-1.62547	-1.60405	-1.58226	-1.56076	-1.5392	-1.51766	-1.4928
668.683	-1.78655	-1.76497	-1.74324	-1.72146	-1.70163	-1.67997	-1.65821	-1.63605	-1.6142	-1.59229	-1.5704	-1.54488
670.079	-1.84436	-1.82245	-1.80039	-1.77827	-1.75813	-1.73614	-1.71404	-1.6915	-1.6693	-1.64704	-1.6248	-1.59861
671.475	-1.90385	-1.88161	-1.85922	-1.83677	-1.81632	-1.794	-1.77156	-1.74863	-1.72609	-1.70348	-1.68088	-1.65402
672.871	-1.96507	-1.9425	-1.91977	-1.89699	-1.87623	-1.85357	-1.8308	-1.80748	-1.78459	-1.76163	-1.73868	-1.71113
674.267	-2.02803	-2.00513	-1.98207	-1.95895	-1.93789	-1.91489	-1.89177	-1.86808	-1.84484	-1.82152	-1.79821	-1.76998
675.663	-2.09276	-2.06953	-2.04614	-2.02268	-2.00131	-1.97797	-1.95452	-1.93044	-1.90685	-1.88318	-1.85951	-1.83058
677.059	-2.15929	-2.13573	-2.11201	-2.08822	-2.06654	-2.04286	-2.01907	-1.9946	-1.97066	-1.94663	-1.92261	-1.89298
678.455	-2.22766	-2.20376	-2.1797	-2.15558	-2.13359	-2.10958	-2.08544	-2.06059	-2.03629	-2.01191	-1.98753	-1.95719
679.851	-2.29788	-2.27365	-2.24926	-2.2248	-2.20251	-2.17815	-2.15367	-2.12843	-2.10378	-2.07904	-2.0543	-2.02325
681.247	-2.36998	-2.34543	-2.3207	-2.29591	-2.2733	-2.24861	-2.22379	-2.19816	-2.17315	-2.14806	-2.12296	-2.0912
682.643	-2.44401	-2.41912	-2.39406	-2.36893	-2.34602	-2.32098	-2.29582	-2.2698	-2.24444	-2.21899	-2.19353	-2.16105
684.039	-2.51998	-2.49476	-2.46937	-2.44391	-2.42068	-2.3953	-2.3698	-2.34339	-2.31767	-2.29186	-2.26604	-2.23284
685.435	-2.59793	-2.57238	-2.54665	-2.52086	-2.49732	-2.4716	-2.44576	-2.41896	-2.39288	-2.36671	-2.34053	-2.3066
686.831	-2.67789	-2.65201	-2.62595	-2.59982	-2.57597	-2.54991	-2.52372	-2.49653	-2.4701	-2.44357	-2.41702	-2.38237
688.227	-2.75989	-2.73368	-2.70729	-2.68082	-2.65666	-2.63026	-2.60373	-2.57615	-2.54936	-2.52246	-2.49555	-2.46018
689.623	-2.84397	-2.81742	-2.7907	-2.7639	-2.73942	-2.71268	-2.68581	-2.65784	-2.63069	-2.60343	-2.57616	-2.54006
691.019	-2.93015	-2.90328	-2.87622	-2.84908	-2.8243	-2.79722	-2.77001	-2.74164	-2.71413	-2.68651	-2.65888	-2.62205
692.415	-3.01848	-2.99128	-2.96389	-2.93641	-2.91132	-2.8839	-2.85634	-2.82758	-2.79971	-2.77173	-2.74373	-2.70618
693.811	-3.10899	-3.08145	-3.05373	-3.02592	-3.00052	-2.97276	-2.94485	-2.9157	-2.88747	-2.85913	-2.83076	-2.79249
695.207	-3.20171	-3.17385	-3.14579	-3.11765	-3.09193	-3.06383	-3.03558	-3.00604	-2.97745	-2.94874	-2.92001	-2.88101
696.603	-3.29668	-3.26849	-3.24011	-3.21163	-3.1856	-3.15716	-3.12857	-3.09863	-3.06968	-3.04061	-3.0115	-2.97179
697.999	-3.39395	-3.36543	-3.33671	-3.3079	-3.28156	-3.25278	-3.22384	-3.19351	-3.1642	-3.13476	-3.10529	-3.06487
699.395	-3.49354	-3.46469	-3.43564	-3.4065	-3.37985	-3.35072	-3.32145	-3.29073	-3.26105	-3.23125	-3.20141	-3.16027
700.791	-3.5955	-3.56633	-3.53695	-3.50747	-3.48051	-3.45105	-3.42142	-3.39031	-3.36028	-3.33011	-3.2999	-3.25806
702.187	-3.69988	-3.67037	-3.64067	-3.61085	-3.58358	-3.55378	-3.52381	-3.49231	-3.46192	-3.43138	-3.4008	-3.35826
703.583	-3.8067	-3.77688	-3.74684	-3.7167	-3.68912	-3.65897	-3.62866	-3.59677	-3.56601	-3.53511	-3.50416	-3.46092
704.979	-3.91603	-3.88588	-3.85551	-3.82503	-3.79715	-3.76666	-3.73601	-3.70373	-3.67261	-3.64134	-3.61002	-3.5661
706.375	-4.0279	-3.99742	-3.96673	-3.93592	-3.90772	-3.8769	-3.8459	-3.81324	-3.78176	-3.75012	-3.71843	-3.67382
707.771	-4.14235	-4.11155	-4.08053	-4.0494	-4.02089	-3.98973	-3.95839	-3.92535	-3.8935	-3.8615	-3.82944	-3.78416
709.167	-4.25944	-4.22832	-4.19698	-4.16552	-4.13671	-4.10521	-4.07353	-4.0401	-4.00789	-3.97552	-3.94308	-3.89714
710.563	-4.37922	-4.34778	-4.31612	-4.28433	-4.25521	-4.22338	-4.19135	-4.15754	-4.12497	-4.09223	-4.05943	-4.01283
711.959	-4.50174	-4.46999	-4.438	-4.40589	-4.37646	-4.34429	-4.31193	-4.27773	-4.2448	-4.2117	-4.17852	-4.13128
713.355	-4.62705	-4.59498	-4.56268	-4.53024	-4.50051	-4.468	-4.4353	-4.40073	-4.36743	-4.33397	-4.30042	-4.25255
714.751	-4.75521	-4.72283	-4.6902	-4.65745	-4.62741	-4.59457	-4.56153	-4.52659	-4.49293	-4.4591	-4.42517	-4.37669
716.147	-4.88627	-4.85358	-4.82064	-4.78756	-4.75722	-4.72406	-4.69067	-4.65536	-4.62134	-4.58714	-4.55285	-4.50376
717.543	-5.02029	-4.98729	-4.95404	-4.92065	-4.89001	-4.85651	-4.82279	-4.78711	-4.75273	-4.71817	-4.68351	-4.63382
718.939	-5.15734	-5.12404	-5.09048	-5.05677	-5.02583	-4.99201	-4.95795	-4.9219	-4.88717	-4.85224	-4.81721	-4.76695
720.335	-5.29747	-5.26387	-5.23001	-5.19598	-5.16475	-5.1306	-5.09621	-5.0598	-5.02471	-4.98942	-4.95402	-4.90321
721.731	-5.44076	-5.40686	-5.37269	-5.33836	-5.30684	-5.27236	-5.23765	-5.20088	-5.16543	-5.12978	-5.09402	-5.04266
723.127	-5.58727	-5.55308	-5.51861	-5.48398	-5.45216	-5.41737	-5.38232	-5.3452	-5.3094	-5.27339	-5.23726	-5.18538
724.523	-5.73707	-5.70259	-5.66783	-5.6329	-5.60079	-5.56568	-5.53031	-5.49284	-5.4567	-5.42033	-5.38383	-5.33145
725.919	-5.89024	-5.85547	-5.82043	-5.7852	-5.75281	-5.71739	-5.6817	-5.64388	-5.60739	-5.57067	-5.5338	-5.48094
727.315	-6.04685	-6.01181	-5.97648	-5.94096	-5.90829	-5.87256	-5.83655	-5.7984	-5.76157	-5.72449	-5.68726	-5.63394
728.711	-6.20698	-6.17167	-6.13607	-6.10027	-6.06732	-6.03129	-5.99496	-5.95648	-5.9193	-5.88188	-5.8443	-5.79054
730.107	-6.37071	-6.33514	-6.29927	-6.26319	-6.22998	-6.19365	-6.15701	-6.11821	-6.0807	-6.04293	-6.00499	-5.95083
731.503	-6.53814	-6.50232	-6.46618	-6.42984	-6.39635	-6.35973	-6.3228	-6.28368	-6.24584	-6.20772	-6.16943	-6.11489
732.899	-6.70934	-6.67328	-6.63689	-6.60029	-6.56655	-6.52964	-6.49241	-6.45299	-6.41482	-6.37637	-6.33773	-6.28284
734.295	-6.88442	-6.84813	-6.8115	-6.77464	-6.74065	-6.70347	-6.66595	-6.62623	-6.58774	-6.54896	-6.50998	-6.45477
735.691	-7.06347	-7.02696	-6.9901	-6.953	-6.91877	-6.88132	-6.84352	-6.80351	-6.76471	-6.7256	-6.68629	-6.63079
737.087	-7.24659	-7.20987	-7.1728	-7.13547	-7.10101	-7.0633	-7.02522	-6.98495	-6.94584	-6.90642	-6.86677	-6.81103
738.483	-7.43389	-7.39698	-7.3597	-7.32215	-7.28747	-7.24952	-7.21118	-7.17065	-7.13125	-7.09151	-7.05154	-6.99559
739.879	-7.62547	-7.58838	-7.55092	-7.51317	-7.47828	-7.4401	-7.4015	-7.36074	-7.32105	-7.28101	-7.24073	-7.1846
741.275	-7.82145	-7.78421	-7.74658	-7.70865	-7.67356	-7.63515	-7.59633	-7.55533	-7.51537	-7.47505	-7.43446	-7.37821
742.671	-8.02195	-7.98457	-7.94679	-7.9087	-7.87343	-7.83482	-7.79577	-7.75457	-7.71435	-7.67375	-7.63287	-7.57654
744.067	-8.22709	-8.1896	-8.15169	-8.11345	-8.07803	-8.03924	-7.99998	-7.9586	-7.91813	-7.87726	-7.8361	-7.77975
745.463	-8.437	-8.39942	-8.36141	-8.32305	-8.28748	-8.24853	-8.20909	-8.16755	-8.12685	-8.08574	-8.04431	-7.98799
746.859	-8.65181	-8.61418	-8.57609	-8.53764	-8.50195	-8.46286	-8.42325	-8.38158	-8.34067	-8.29933	-8.25765	-8.20142
748.255	-8.87165	-8.834	-8.79587	-8.75736	-8.72157	-8.68237	-8.64262	-8.60085	-8.55976	-8.51821	-8.4763	-8.42022
749.651	-9.09667	-9.05903	-9.0209	-8.98236	-8.94651	-8.90723	-8.86737	-8.82552	-8.78427	-8.74254	-8.70043	-8.64456
751.047	-9.32701	-9.28943	-9.25134	-9.21281	-9.17693	-9.13759	-9.09766	-9.05578	-9.0144	-8.97252	-8.93022	-8.87465
752.443	-9.56283	-9.52536	-9.48734	-9.44887	-9.41299	-9.37365	-9.33368	-9.29181	-9.25033	-9.20832	-9.16587	-9.11068
753.839	-9.80427	-9.76696	-9.72908	-9.69071	-9.65489	-9.61558	-9.5756	-9.53379	-9.49226	-9.45016	-9.40759	-9.35286
755.235	-10.0515	-10.0144	-9.97673	-9.93852	-9.90279	-9.86357	-9.82364	-9.78194	-9.7404	-9.69825	-9.65559	-9.60143
756.631	-10.3047	-10.2679	-10.2305	-10.1925	-10.1569	-10.1178	-10.078	-10.0365	-9.99495	-9.9528	-9.9101	-9.85662
758.027	-10.5639	-10.5275	-10.4904	-10.4528	-10.4174	-10.3785	-10.3389	-10.2976	-10.2562	-10.2141	-10.1714	-10.1187
759.423	-10.8295	-10.7935	-10.7569	-10.7196	-10.6845	-10.6459	-10.6065	-10.5655	-10.5242	-10.4823	-10.4397	-10.3879
760.819	-11.1014	-11.066	-11.0299	-10.9931	-10.9584	-10.9202	-10.881	-10.8405	-10.7995	-10.7577	-10.7152	-10.6645
762.215	-11.38	-11.3453	-11.3098	-11.2735	-11.2393	-11.2015	-11.1628	-11.1228	-11.0821	-11.0406	-10.9983	-10.9488
763.611	-11.6652	-11.6313	-11.5966	-11.5611	-11.5274	-11.4902	-11.452	-11.4126	-11.3724	-11.3312	-11.2892	-11.2411
765.007	-11.9573	-11.9244	-11.8906	-11.8559	-11.8229	-11.7865	-11.7489	-11.7103	-11.6705	-11.6299	-11.5883	-11.5418
766.403	-12.2564	-12.2246	-12.1919	-12.1582	-12.126	-12.0905	-12.0537	-12.016	-11.9769	-11.9368	-11.8958	-11.8511
767.799	-12.5626	-12.5321	-12.5007	-12.4682	-12.437	-12.4025	-12.3667	-12.33	-12.2918	-12.2525	-12.2121	-12.1695
769.195	-12.8759	-12.847	-12.817	-12.786	-12.7559	-12.7227	-12.688	-12.6527	-12.6154	-12.577	-12.5375	-12.4972
770.591	-13.1964	-13.1693	-13.141	-13.1116	-13.083	-13.0512	-13.0179	-12.9841	-12.9481	-12.9108	-12.8723	-12.8347
771.987	-13.5239	-13.499	-13.4728	-13.4453	-13.4184	-13.3883	-13.3566	-13.3246	-13.29	-13.2541	-13.2169	-13.1823
773.383	-13.8585	-13.836	-13.8122	-13.787	-13.762	-13.734	-13.7042	-13.6743	-13.6415	-13.6072	-13.5716	-13.5403
774.779	-14.2	-14.1803	-14.1592	-14.1367	-14.114	-14.0884	-14.0609	-14.0334	-14.0027	-13.9704	-13.9365	-13.9092
776.175	-14.548	-14.5316	-14.5137	-14.4943	-14.4742	-14.4514	-14.4266	-14.402	-14.3738	-14.3438	-14.3121	-14.2892
777.571	-14.9021	-14.8895	-14.8753	-14.8594	-14.8424	-14.8229	-14.8013	-14.7801	-14.7548	-14.7276	-14.6986	-14.6806
778.967	-15.2616	-15.2534	-15.2435	-15.2318	-15.2184	-15.2028	-15.1848	-15.1675	-15.1457	-15.1218	-15.0959	-15.0836
780.363	-15.6258	-15.6226	-15.6176	-15.6107	-15.6015	-15.5904	-15.5768	-15.5641	-15.5463	-15.5264	-15.5042	-15.4983
781.759	-15.9936	-15.9961	-15.9968	-15.9954	-15.9911	-15.9852	-15.9767	-15.9693	-15.9564	-15.941	-15.9233	-15.9248
783.155	-16.3634	-16.3725	-16.3797	-16.3847	-16.386	-16.3862	-16.3836	-16.3824	-16.3751	-16.3653	-16.3529	-16.3627
784.551	-16.7336	-16.7501	-16.7647	-16.7771	-16.7848	-16.7921	-16.7963	-16.8023	-16.8017	-16.7983	-16.7922	-16.8115
785.947	-17.1017	-17.1267	-17.1497	-17.1704	-17.1857	-17.2011	-17.2133	-17.2276	-17.2347	-17.2389	-17.2402	-17.2703
787.343	-17.4652	-17.4997	-17.5321	-17.5623	-17.5861	-17.6108	-17.6321	-17.656	-17.6722	-17.6854	-17.6953	-17.7377
788.739	-17.8206	-17.8656	-17.9087	-17.9495	-17.9829	-18.0182	-18.0501	-18.0849	-18.1116	-18.1351	-18.1553	-18.2116
790.135	-18.1641	-18.2206	-18.2754	-18.3281	-18.3723	-18.4195	-18.4633	-18.5106	-18.5494	-18.5849	-18.6171	-18.689
791.531	-18.4911	-18.5601	-18.6277	-18.6935	-18.7496	-18.8102	-18.8674	-18.9286	-18.9811	-19.0304	-19.0764	-19.1657
792.927	-18.7967	-18.8791	-18.9604	-19.0402	-19.1094	-19.1845	-19.2565	-19.3332	-19.4012	-19.4661	-19.5278	-19.6364
794.323	-19.0755	-19.1718	-19.2675	-19.3622	-19.4454	-19.5361	-19.6243	-19.7177	-19.8027	-19.8851	-19.9646	-20.0939
795.719	-19.3221	-19.4325	-19.543	-19.653	-19.7507	-19.8579	-19.9631	-20.0744	-20.1778	-20.2792	-20.3782	-20.5294
797.115	-19.5313	-19.6555	-19.7806	-19.906	-20.0183	-20.1424	-20.2651	-20.3947	-20.5174	-20.639	-20.7589	-20.9325
798.511	-19.6982	-19.8356	-19.9746	-20.1148	-20.2414	-20.3819	-20.5221	-20.6699	-20.8122	-20.9543	-21.0959	-21.2914
799.907	-19.8194	-19.9686	-20.1203	-20.2741	-20.414	-20.57	-20.7266	-20.8917	-21.0527	-21.215	-21.3781	-21.5937
801.303	-19.8924	-20.0517	-20.2144	-20.38	-20.5315	-20.7011	-20.8725	-21.0529	-21.2312	-21.412	-21.5952	-21.8277
802.699	-19.9165	-20.0838	-20.2552	-20.4303	-20.5913	-20.7722	-20.9558	-21.1488	-21.3417	-21.5385	-21.7391	-21.9838
804.095	-19.8928	-20.0657	-20.2433	-20.4252	-20.5932	-20.7823	-20.9752	-21.1774	-21.3814	-21.5906	-21.8049	-22.0563
805.491	-19.8238	-19.9999	-20.181	-20.3669	-20.5391	-20.7334	-20.9321	-21.1398	-21.351	-21.5684	-21.792	-22.0441
806.887	-19.7133	-19.8902	-20.0723	-20.2595	-20.4333	-20.6296	-20.8307	-21.0402	-21.2546	-21.4758	-21.7039	-21.951
808.283	-19.5662	-19.7417	-19.9225	-20.1085	-20.2815	-20.4768	-20.6773	-20.885	-21.0989	-21.3198	-21.548	-21.7851
809.679	-19.3876	-19.56	-19.7375	-19.9202	-20.0902	-20.2822	-20.4792	-20.6824	-20.8925	-21.1096	-21.3339	-21.5573
811.075	-19.1831	-19.3509	-19.5236	-19.7012	-19.8666	-20.0532	-20.2447	-20.441	-20.6448	-20.8552	-21.0726	-21.28
812.471	-18.9579	-19.12	-19.2867	-19.458	-19.6176	-19.7973	-19.9816	-20.1695	-20.3651	-20.5669	-20.775	-20.9652
813.867	-18.717	-18.8726	-19.0325	-19.1967	-19.3495	-19.5214	-19.6974	-19.8759	-20.0621	-20.2538	-20.4514	-20.624
815.263	-18.4646	-18.6133	-18.766	-18.9224	-19.0679	-19.2314	-19.3986	-19.567	-19.7432	-19.9243	-20.1105	-20.266
816.659	-18.2047	-18.3462	-18.4913	-18.6397	-18.7778	-18.9326	-19.0907	-19.249	-19.4148	-19.585	-19.7597	-19.899
818.055	-17.9403	-18.0746	-18.2121	-18.3526	-18.4831	-18.6292	-18.7783	-18.9265	-19.0821	-19.2415	-19.4048	-19.529
819.451	-17.6742	-17.8014	-17.9314	-18.064	-18.1871	-18.3247	-18.4649	-18.6034	-18.7491	-18.898	-19.0503	-19.1607
820.847	-17.4085	-17.5288	-17.6514	-17.7765	-17.8924	-18.0218	-18.1534	-18.2827	-18.4188	-18.5578	-18.6996	-18.7976
822.243	-17.145	-17.2585	-17.3742	-17.4919	-17.601	-17.7225	-17.846	-17.9665	-18.0937	-18.2232	-18.3552	-18.442
823.639	-16.8849	-16.9921	-17.1011	-17.2119	-17.3144	-17.4285	-17.5442	-17.6566	-17.7753	-17.8961	-18.0189	-18.0957
825.035	-16.6294	-16.7305	-16.8331	-16.9374	-17.0338	-17.1409	-17.2493	-17.3541	-17.4649	-17.5775	-17.6918	-17.7597
826.431	-16.3792	-16.4745	-16.5712	-16.6693	-16.7599	-16.8604	-16.9621	-17.0598	-17.1633	-17.2683	-17.3748	-17.4348
827.827	-16.1348	-16.2247	-16.3158	-16.4081	-16.4933	-16.5877	-16.683	-16.7742	-16.8709	-16.9689	-17.0681	-17.1211
829.223	-15.8967	-15.9815	-16.0674	-16.1542	-16.2344	-16.323	-16.4125	-16.4976	-16.5881	-16.6796	-16.7721	-16.8189
830.619	-15.6651	-15.7452	-15.8261	-15.9079	-15.9833	-16.0666	-16.1507	-16.2302	-16.3148	-16.4004	-16.4868	-16.5281
832.015	-15.4403	-15.5158	-15.5921	-15.6692	-15.7402	-15.8186	-15.8975	-15.9719	-16.0512	-16.1312	-16.2119	-16.2485
833.411	-15.2221	-15.2935	-15.3655	-15.4381	-15.5051	-15.5788	-15.653	-15.7227	-15.797	-15.8719	-15.9474	-15.9798
834.807	-15.0107	-15.0782	-15.1462	-15.2147	-15.2778	-15.3472	-15.4171	-15.4824	-15.5521	-15.6223	-15.693	-15.7216
836.203	-14.806	-14.8698	-14.934	-14.9987	-15.0582	-15.1237	-15.1895	-15.2507	-15.3162	-15.382	-15.4483	-15.4737
837.599	-14.6079	-14.6683	-14.729	-14.7901	-14.8463	-14.908	-14.97	-15.0275	-15.0891	-15.1509	-15.2131	-15.2356
838.995	-14.4163	-14.4734	-14.5309	-14.5886	-14.6417	-14.7	-14.7585	-14.8125	-14.8704	-14.9285	-14.9869	-15.007
840.391	-14.231	-14.2851	-14.3395	-14.3941	-14.4443	-14.4994	-14.5546	-14.6054	-14.6599	-14.7146	-14.7695	-14.7875
841.787	-14.0519	-14.1032	-14.1547	-14.2064	-14.2539	-14.306	-14.3581	-14.406	-14.4574	-14.5088	-14.5605	-14.5766
843.183	-13.8788	-13.9275	-13.9763	-14.0252	-14.0702	-14.1195	-14.1687	-14.2139	-14.2623	-14.3109	-14.3595	-14.3741
844.579	-13.7115	-13.7577	-13.804	-13.8504	-13.893	-13.9396	-13.9862	-14.0289	-14.0746	-14.1204	-14.1662	-14.1795
845.975	-13.5499	-13.5938	-13.6377	-13.6817	-13.7221	-13.7663	-13.8104	-13.8507	-13.8939	-13.9371	-13.9803	-13.9925
847.371	-13.3937	-13.4354	-13.4771	-13.5189	-13.5572	-13.5991	-13.6409	-13.6791	-13.7199	-13.7607	-13.8015	-13.8128
848.767	-13.2429	-13.2825	-13.3221	-13.3618	-13.3981	-13.4379	-13.4775	-13.5137	-13.5523	-13.5909	-13.6294	-13.64
850.163	-13.0971	-13.1348	-13.1725	-13.2101	-13.2447	-13.2824	-13.32	-13.3543	-13.3908	-13.4273	-13.4638	-13.4738
851.559	-12.9562	-12.9921	-13.028	-13.0638	-13.0966	-13.1324	-13.1681	-13.2007	-13.2353	-13.2699	-13.3044	-13.3139
852.955	-12.82	-12.8543	-12.8884	-12.9225	-12.9537	-12.9878	-13.0217	-13.0526	-13.0854	-13.1182	-13.1509	-13.1601
854.351	-12.6885	-12.7211	-12.7536	-12.786	-12.8157	-12.8482	-12.8804	-12.9098	-12.941	-12.972	-13.003	-13.0121
855.747	-12.5613	-12.5924	-12.6234	-12.6543	-12.6826	-12.7134	-12.7441	-12.7721	-12.8017	-12.8312	-12.8606	-12.8696
857.143	-12.4383	-12.468	-12.4975	-12.527	-12.554	-12.5834	-12.6125	-12.6393	-12.6674	-12.6954	-12.7233	-12.7323
858.539	-12.3194	-12.3477	-12.3759	-12.404	-12.4298	-12.4578	-12.4856	-12.5111	-12.5379	-12.5644	-12.591	-12.6001
859.935	-12.2044	-12.2315	-12.2584	-12.2852	-12.3098	-12.3365	-12.363	-12.3874	-12.4129	-12.4382	-12.4633	-12.4727
861.331	-12.0931	-12.119	-12.1448	-12.1704	-12.1938	-12.2193	-12.2446	-12.268	-12.2922	-12.3163	-12.3403	-12.3499
862.727	-11.9855	-12.0103	-12.0349	-12.0594	-12.0818	-12.1061	-12.1302	-12.1526	-12.1757	-12.1987	-12.2215	-12.2315
864.123	-11.8813	-11.905	-11.9286	-11.952	-11.9734	-11.9967	-12.0197	-12.0412	-12.0632	-12.0851	-12.1069	-12.1172
865.519	-11.7804	-11.8031	-11.8257	-11.8481	-11.8686	-11.8909	-11.9129	-11.9335	-11.9546	-11.9755	-11.9962	-12.007
866.915	-11.6827	-11.7045	-11.7261	-11.7476	-11.7672	-11.7885	-11.8095	-11.8294	-11.8496	-11.8695	-11.8893	-11.9006
868.311	-11.5881	-11.609	-11.6297	-11.6503	-11.6691	-11.6895	-11.7096	-11.7288	-11.748	-11.7671	-11.786	-11.7978
869.707	-11.4963	-11.5164	-11.5363	-11.556	-11.5741	-11.5936	-11.6129	-11.6314	-11.6499	-11.6681	-11.6862	-11.6985
871.103	-11.4074	-11.4267	-11.4458	-11.4648	-11.4821	-11.5008	-11.5193	-11.5372	-11.5549	-11.5723	-11.5897	-11.6025
872.499	-11.3212	-11.3398	-11.3581	-11.3763	-11.3929	-11.4109	-11.4287	-11.446	-11.4629	-11.4797	-11.4963	-11.5097
873.895	-11.2375	-11.2554	-11.273	-11.2905	-11.3065	-11.3238	-11.3408	-11.3576	-11.3739	-11.3899	-11.4059	-11.42
875.291	-11.1563	-11.1735	-11.1905	-11.2073	-11.2227	-11.2393	-11.2557	-11.272	-11.2876	-11.3031	-11.3184	-11.333
876.687	-11.0774	-11.094	-11.1104	-11.1266	-11.1414	-11.1574	-11.1732	-11.189	-11.204	-11.2189	-11.2336	-11.2489
878.083	-11.0008	-11.0168	-11.0326	-11.0482	-11.0625	-11.0779	-11.0931	-11.1084	-11.1229	-11.1372	-11.1514	-11.1673
879.479	-10.9263	-10.9418	-10.957	-10.9721	-10.9858	-11.0007	-11.0153	-11.0303	-11.0443	-11.0581	-11.0717	-11.0882
880.875	-10.8538	-10.8688	-10.8835	-10.8981	-10.9113	-10.9257	-10.9398	-10.9544	-10.9679	-10.9812	-10.9944	-11.0115
882.271	-10.7833	-10.7978	-10.812	-10.8261	-10.8389	-10.8528	-10.8664	-10.8807	-10.8937	-10.9066	-10.9194	-10.937
883.667	-10.7147	-10.7287	-10.7425	-10.7561	-10.7685	-10.7819	-10.7951	-10.809	-10.8216	-10.8341	-10.8464	-10.8647
885.063	-10.6478	-10.6614	-10.6747	-10.6879	-10.6999	-10.7129	-10.7256	-10.7393	-10.7515	-10.7636	-10.7756	-10.7944
886.459	-10.5826	-10.5958	-10.6087	-10.6215	-10.6331	-10.6457	-10.6581	-10.6714	-10.6833	-10.695	-10.7066	-10.7259
887.855	-10.519	-10.5318	-10.5443	-10.5567	-10.568	-10.5803	-10.5922	-10.6053	-10.6169	-10.6282	-10.6395	-10.6593
889.251	-10.4569	-10.4693	-10.4815	-10.4936	-10.5046	-10.5164	-10.528	-10.5409	-10.5521	-10.5632	-10.5741	-10.5944
890.647	-10.3963	-10.4083	-10.4202	-10.4319	-10.4426	-10.4542	-10.4654	-10.4781	-10.489	-10.4998	-10.5104	-10.5312
892.043	-10.337	-10.3488	-10.3603	-10.3717	-10.3821	-10.3933	-10.4043	-10.4167	-10.4274	-10.4379	-10.4483	-10.4694
893.439	-10.279	-10.2905	-10.3017	-10.3128	-10.323	-10.3339	-10.3446	-10.3568	-10.3672	-10.3775	-10.3876	-10.4091
894.835	-10.2222	-10.2334	-10.2444	-10.2553	-10.2651	-10.2758	-10.2862	-10.2983	-10.3084	-10.3184	-10.3284	-10.3502
896.231	-10.1666	-10.1776	-10.1883	-10.1989	-10.2085	-10.2189	-10.2291	-10.241	-10.2509	-10.2607	-10.2704	-10.2925
897.627	-10.1122	-10.1229	-10.1333	-10.1437	-10.1531	-10.1633	-10.1732	-10.1849	-10.1946	-10.2042	-10.2137	-10.2361
899.023	-10.0587	-10.0692	-10.0794	-10.0895	-10.0987	-10.1087	-10.1184	-10.1299	-10.1395	-10.1489	-10.1582	-10.1807
900.419	-10.0062	-10.0165	-10.0265	-10.0364	-10.0454	-10.0552	-10.0647	-10.076	-10.0854	-10.0947	-10.1038	-10.1265
901.815	-9.95469	-9.96474	-9.97457	-9.98425	-9.99308	-10.0026	-10.0119	-10.0232	-10.0324	-10.0415	-10.0505	-10.0732
903.211	-9.90403	-9.91388	-9.92352	-9.93301	-9.94167	-9.95104	-9.96015	-9.97124	-9.98031	-9.98924	-9.99809	-10.0209
904.607	-9.85419	-9.86385	-9.87331	-9.88263	-9.89113	-9.90033	-9.90927	-9.92021	-9.92914	-9.93793	-9.94664	-9.9694
906.003	-9.80512	-9.81462	-9.82391	-9.83306	-9.8414	-9.85044	-9.85922	-9.87003	-9.87882	-9.88748	-9.89607	-9.91875
907.399	-9.7568	-9.76612	-9.77526	-9.78425	-9.79245	-9.80133	-9.80997	-9.82063	-9.8293	-9.83783	-9.8463	-9.86886
908.795	-9.70916	-9.71833	-9.72731	-9.73616	-9.74422	-9.75296	-9.76145	-9.77198	-9.78053	-9.78895	-9.7973	-9.81968
910.191	-9.66218	-9.6712	-9.68004	-9.68874	-9.69668	-9.70528	-9.71364	-9.72402	-9.73246	-9.74077	-9.74902	-9.77116
911.587	-9.61581	-9.62469	-9.63339	-9.64196	-9.64977	-9.65825	-9.66648	-9.67672	-9.68505	-9.69326	-9.70142	-9.72326
912.983	-9.57002	-9.57877	-9.58734	-9.59578	-9.60348	-9.61183	-9.61994	-9.63004	-9.63827	-9.64638	-9.65444	-9.67594
914.379	-9.52479	-9.53341	-9.54185	-9.55016	-9.55776	-9.56599	-9.57399	-9.58394	-9.59207	-9.60009	-9.60806	-9.62916
915.775	-9.48007	-9.48856	-9.49688	-9.50508	-9.51257	-9.52069	-9.52858	-9.53838	-9.54642	-9.55435	-9.56223	-9.58287
917.171	-9.43584	-9.44422	-9.45242	-9.46051	-9.46789	-9.4759	-9.48369	-9.49334	-9.50129	-9.50913	-9.51692	-9.53706
918.567	-9.39208	-9.40034	-9.40843	-9.41641	-9.42369	-9.4316	-9.43929	-9.44878	-9.45664	-9.46439	-9.47211	-9.49168
919.963	-9.34876	-9.35691	-9.36489	-9.37276	-9.37995	-9.38776	-9.39535	-9.40468	-9.41245	-9.42012	-9.42775	-9.44671
921.359	-9.30586	-9.3139	-9.32177	-9.32954	-9.33664	-9.34435	-9.35184	-9.36101	-9.3687	-9.37628	-9.38383	-9.40213
922.755	-9.26336	-9.2713	-9.27907	-9.28673	-9.29374	-9.30136	-9.30875	-9.31775	-9.32535	-9.33285	-9.34032	-9.35792
924.151	-9.22125	-9.22908	-9.23675	-9.24432	-9.25124	-9.25876	-9.26606	-9.27489	-9.2824	-9.28982	-9.29721	-9.31405
925.547	-9.17952	-9.18724	-9.19481	-9.20227	-9.20911	-9.21653	-9.22375	-9.2324	-9.23982	-9.24715	-9.25446	-9.27051
926.943	-9.13814	-9.14576	-9.15322	-9.16059	-9.16734	-9.17467	-9.1818	-9.19026	-9.1976	-9.20485	-9.21207	-9.22728
928.339	-9.0971	-9.10462	-9.11199	-9.11926	-9.12592	-9.13316	-9.14019	-9.14847	-9.15572	-9.16288	-9.17002	-9.18436
929.735	-9.05641	-9.06382	-9.07109	-9.07826	-9.08484	-9.09198	-9.09893	-9.10701	-9.11417	-9.12124	-9.12829	-9.14172
931.131	-9.01604	-9.02335	-9.03052	-9.03759	-9.04408	-9.05114	-9.05799	-9.06588	-9.07294	-9.07992	-9.08688	-9.09937
932.527	-8.976	-8.98321	-8.99027	-8.99725	-9.00365	-9.01061	-9.01738	-9.02506	-9.03202	-9.03891	-9.04578	-9.05729
933.923	-8.93627	-8.94338	-8.95034	-8.95722	-8.96353	-8.9704	-8.97707	-8.98455	-8.99141	-8.9982	-9.00498	-9.01549
935.319	-8.89686	-8.90387	-8.91073	-8.91751	-8.92373	-8.9305	-8.93708	-8.94434	-8.9511	-8.9578	-8.96448	-8.97396
936.715	-8.85777	-8.86466	-8.87142	-8.8781	-8.88423	-8.8909	-8.89739	-8.90443	-8.91109	-8.91768	-8.92426	-8.9327
938.111	-8.81898	-8.82578	-8.83243	-8.839	-8.84504	-8.85162	-8.85801	-8.86483	-8.87138	-8.87786	-8.88434	-8.89171
939.507	-8.78051	-8.7872	-8.79374	-8.80021	-8.80616	-8.81263	-8.81893	-8.82552	-8.83196	-8.83834	-8.84471	-8.85099
940.903	-8.74236	-8.74894	-8.75537	-8.76173	-8.76759	-8.77396	-8.78015	-8.78652	-8.79284	-8.79911	-8.80536	-8.81055
942.299	-8.70453	-8.71099	-8.71732	-8.72357	-8.72933	-8.73559	-8.74169	-8.74782	-8.75402	-8.76017	-8.76631	-8.7704
943.695	-8.66701	-8.67336	-8.67958	-8.68572	-8.69138	-8.69754	-8.70353	-8.70942	-8.71551	-8.72154	-8.72756	-8.73054
945.091	-8.62983	-8.63606	-8.64216	-8.6482	-8.65376	-8.6598	-8.66569	-8.67134	-8.6773	-8.6832	-8.68911	-8.69097
946.487	-8.59298	-8.59909	-8.60508	-8.611	-8.61645	-8.62239	-8.62816	-8.63357	-8.63941	-8.64518	-8.65096	-8.65172
947.883	-8.55646	-8.56246	-8.56833	-8.57413	-8.57948	-8.58531	-8.59097	-8.59613	-8.60183	-8.60748	-8.61313	-8.61277
949.279	-8.52029	-8.52617	-8.53192	-8.5376	-8.54285	-8.54855	-8.5541	-8.55902	-8.56459	-8.5701	-8.57561	-8.57416
950.675	-8.48448	-8.49023	-8.49586	-8.50142	-8.50656	-8.51215	-8.51758	-8.52225	-8.52768	-8.53305	-8.53843	-8.53589
952.071	-8.44902	-8.45465	-8.46015	-8.46559	-8.47062	-8.47609	-8.4814	-8.48582	-8.49111	-8.49635	-8.50158	-8.49796
953.467	-8.41394	-8.41944	-8.42482	-8.43013	-8.43504	-8.44039	-8.44558	-8.44976	-8.4549	-8.45999	-8.46508	-8.4604
954.863	-8.37923	-8.38461	-8.38985	-8.39504	-8.39984	-8.40506	-8.41013	-8.41405	-8.41905	-8.42399	-8.42894	-8.42321
956.259	-8.34491	-8.35016	-8.35527	-8.36033	-8.36501	-8.37011	-8.37505	-8.37872	-8.38357	-8.38837	-8.39316	-8.38642
957.655	-8.31098	-8.3161	-8.32108	-8.32601	-8.33057	-8.33554	-8.34035	-8.34378	-8.34848	-8.35312	-8.35776	-8.35002
959.051	-8.27747	-8.28244	-8.28729	-8.29209	-8.29653	-8.30137	-8.30605	-8.30924	-8.31378	-8.31826	-8.32275	-8.31404
960.447	-8.24436	-8.2492	-8.25392	-8.25858	-8.2629	-8.2676	-8.27215	-8.27509	-8.27948	-8.28381	-8.28814	-8.27848
961.843	-8.21168	-8.21638	-8.22096	-8.22549	-8.22968	-8.23425	-8.23867	-8.24137	-8.24559	-8.24976	-8.25394	-8.24337
963.239	-8.17943	-8.184	-8.18844	-8.19282	-8.1969	-8.20133	-8.20561	-8.20807	-8.21213	-8.21615	-8.22016	-8.20871
964.635	-8.14762	-8.15205	-8.15635	-8.1606	-8.16455	-8.16884	-8.17299	-8.17521	-8.17911	-8.18296	-8.18681	-8.17453
966.031	-8.11626	-8.12055	-8.12471	-8.12882	-8.13264	-8.1368	-8.14081	-8.1428	-8.14653	-8.15022	-8.1539	-8.14082
967.427	-8.08536	-8.08951	-8.09353	-8.0975	-8.10119	-8.10521	-8.10908	-8.11084	-8.11441	-8.11793	-8.12145	-8.1076
968.823	-8.05493	-8.05894	-8.06282	-8.06665	-8.07021	-8.07408	-8.07781	-8.07935	-8.08276	-8.08611	-8.08946	-8.07489
970.219	-8.02497	-8.02884	-8.03258	-8.03627	-8.0397	-8.04343	-8.04702	-8.04834	-8.05158	-8.05476	-8.05795	-8.0427
971.615	-7.9955	-7.99923	-8.00283	-8.00637	-8.00967	-8.01326	-8.01671	-8.01781	-8.02088	-8.0239	-8.02692	-8.01104
973.011	-7.96652	-7.97011	-7.97356	-7.97696	-7.98013	-7.98358	-7.98688	-7.98778	-7.99068	-7.99354	-7.99639	-7.97992
974.407	-7.93804	-7.94148	-7.94479	-7.94805	-7.95109	-7.95439	-7.95755	-7.95825	-7.96099	-7.96367	-7.96636	-7.94935
975.803	-7.91006	-7.91336	-7.91653	-7.91964	-7.92255	-7.92572	-7.92873	-7.92923	-7.9318	-7.93432	-7.93684	-7.91934
977.199	-7.8826	-7.88576	-7.88878	-7.89175	-7.89453	-7.89755	-7.90042	-7.90073	-7.90314	-7.90549	-7.90784	-7.88989
978.595	-7.85564	-7.85866	-7.86154	-7.86437	-7.86702	-7.8699	-7.87263	-7.87275	-7.875	-7.87718	-7.87937	-7.86103
979.991	-7.82921	-7.83209	-7.83483	-7.83752	-7.84004	-7.84277	-7.84536	-7.84531	-7.84739	-7.84941	-7.85143	-7.83274
981.387	-7.80331	-7.80605	-7.80865	-7.81119	-7.81358	-7.81617	-7.81862	-7.8184	-7.82032	-7.82218	-7.82404	-7.80506
982.783	-7.77793	-7.78053	-7.78299	-7.7854	-7.78766	-7.79011	-7.79242	-7.79203	-7.79379	-7.79549	-7.79719	-7.77796
984.179	-7.75309	-7.75555	-7.75787	-7.76014	-7.76227	-7.76458	-7.76675	-7.76621	-7.76781	-7.76936	-7.77089	-7.75148
985.575	-7.72878	-7.7311	-7.73329	-7.73542	-7.73742	-7.7396	-7.74163	-7.74094	-7.74239	-7.74378	-7.74516	-7.7256
986.971	-7.705	-7.7072	-7.70925	-7.71124	-7.71312	-7.71516	-7.71705	-7.71623	-7.71752	-7.71875	-7.71998	-7.70033
988.367	-7.68177	-7.68383	-7.68574	-7.6876	-7.68936	-7.69126	-7.69302	-7.69207	-7.69321	-7.69429	-7.69536	-7.67567
989.763	-7.65907	-7.661	-7.66279	-7.66451	-7.66615	-7.66792	-7.66954	-7.66846	-7.66946	-7.67039	-7.67131	-7.65164
991.159	-7.63691	-7.63871	-7.64037	-7.64196	-7.64348	-7.64512	-7.64661	-7.64542	-7.64627	-7.64706	-7.64783	-7.62822
992.555	-7.61529	-7.61697	-7.61849	-7.61996	-7.62136	-7.62287	-7.62423	-7.62294	-7.62364	-7.62429	-7.62492	-7.60542
993.951	-7.59421	-7.59576	-7.59716	-7.5985	-7.59978	-7.60116	-7.60239	-7.60101	-7.60158	-7.60209	-7.60258	-7.58323
995.347	-7.57366	-7.57509	-7.57636	-7.57758	-7.57875	-7.58001	-7.58111	-7.57964	-7.58008	-7.58045	-7.58081	-7.56166
996.743	-7.55364	-7.55495	-7.55611	-7.55721	-7.55826	-7.5594	-7.56038	-7.55883	-7.55913	-7.55938	-7.5596	-7.54071
998.139	-7.53415	-7.53534	-7.53638	-7.53736	-7.53831	-7.53932	-7.54019	-7.53857	-7.53875	-7.53886	-7.53896	-7.52037
999.535	-7.51518	-7.51626	-7.51719	-7.51805	-7.51889	-7.51979	-7.52054	-7.51886	-7.51892	-7.51891	-7.51888	-7.50063
1000.93	-7.49673	-7.4977	-7.49852	-7.49927	-7.50001	-7.50079	-7.50142	-7.49969	-7.49963	-7.49951	-7.49936	-7.4815
1002.33	-7.47879	-7.47966	-7.48037	-7.48101	-7.48165	-7.48232	-7.48284	-7.48107	-7.4809	-7.48066	-7.4804	-7.46296
1003.72	-7.46137	-7.46213	-7.46273	-7.46327	-7.46381	-7.46438	-7.46479	-7.46298	-7.4627	-7.46235	-7.46198	-7.44501
1005.12	-7.44444	-7.4451	-7.4456	-7.44604	-7.44648	-7.44695	-7.44726	-7.44543	-7.44504	-7.44459	-7.44411	-7.42765
1006.51	-7.42801	-7.42857	-7.42898	-7.42932	-7.42966	-7.43004	-7.43024	-7.42839	-7.42791	-7.42735	-7.42678	-7.41086
1007.91	-7.41206	-7.41253	-7.41284	-7.41309	-7.41335	-7.41362	-7.41373	-7.41187	-7.41129	-7.41065	-7.40997	-7.39463
1009.31	-7.39659	-7.39697	-7.39719	-7.39735	-7.39752	-7.3977	-7.39772	-7.39586	-7.39519	-7.39445	-7.39369	-7.37896
1010.7	-7.38159	-7.38189	-7.38202	-7.38209	-7.38218	-7.38227	-7.3822	-7.38034	-7.37959	-7.37877	-7.37793	-7.36383
1012.1	-7.36705	-7.36726	-7.36731	-7.3673	-7.36731	-7.36732	-7.36716	-7.36532	-7.36449	-7.36359	-7.36266	-7.34924
1013.49	-7.35295	-7.35309	-7.35306	-7.35297	-7.3529	-7.35283	-7.35259	-7.35078	-7.34987	-7.3489	-7.3479	-7.33517
1014.89	-7.3393	-7.33936	-7.33925	-7.33908	-7.33895	-7.3388	-7.33849	-7.3367	-7.33573	-7.33469	-7.33362	-7.32161
1016.29	-7.32607	-7.32606	-7.32588	-7.32564	-7.32544	-7.32522	-7.32483	-7.32308	-7.32205	-7.32094	-7.31981	-7.30855
1017.68	-7.31325	-7.31317	-7.31293	-7.31263	-7.31236	-7.31207	-7.31161	-7.30991	-7.30881	-7.30765	-7.30646	-7.29596
1019.08	-7.30084	-7.3007	-7.30039	-7.30003	-7.2997	-7.29935	-7.29883	-7.29717	-7.29602	-7.29481	-7.29356	-7.28385
1020.47	-7.28882	-7.28862	-7.28825	-7.28783	-7.28745	-7.28704	-7.28645	-7.28485	-7.28366	-7.2824	-7.28111	-7.27218
1021.87	-7.27717	-7.27692	-7.2765	-7.27602	-7.27559	-7.27512	-7.27448	-7.27294	-7.2717	-7.2704	-7.26907	-7.26096
1023.27	-7.26589	-7.26558	-7.26512	-7.26458	-7.26411	-7.26359	-7.2629	-7.26142	-7.26015	-7.25882	-7.25745	-7.25015
1024.66	-7.25496	-7.25461	-7.25409	-7.25352	-7.25299	-7.25243	-7.25169	-7.25028	-7.24899	-7.24762	-7.24622	-7.23975
1026.06	-7.24436	-7.24397	-7.24341	-7.2428	-7.24223	-7.24162	-7.24084	-7.23951	-7.23819	-7.2368	-7.23538	-7.22973
1027.45	-7.23409	-7.23366	-7.23307	-7.23241	-7.23181	-7.23116	-7.23034	-7.2291	-7.22775	-7.22634	-7.2249	-7.22008
1028.85	-7.22412	-7.22366	-7.22303	-7.22234	-7.22171	-7.22103	-7.22017	-7.21901	-7.21766	-7.21623	-7.21477	-7.21079
1030.25	-7.21445	-7.21396	-7.2133	-7.21258	-7.21192	-7.21121	-7.21032	-7.20925	-7.20789	-7.20645	-7.20498	-7.20182
1031.64	-7.20506	-7.20454	-7.20386	-7.20311	-7.20243	-7.20169	-7.20078	-7.1998	-7.19843	-7.19698	-7.19551	-7.19317
1033.04	-7.19592	-7.19538	-7.19468	-7.19392	-7.19321	-7.19245	-7.19152	-7.19063	-7.18926	-7.18782	-7.18635	-7.18482
1034.43	-7.18704	-7.18648	-7.18576	-7.18498	-7.18426	-7.18348	-7.18253	-7.18174	-7.18037	-7.17894	-7.17747	-7.17674
1035.83	-7.17839	-7.17782	-7.17709	-7.17629	-7.17555	-7.17476	-7.1738	-7.17311	-7.17175	-7.17032	-7.16887	-7.16893
1037.23	-7.16996	-7.16938	-7.16864	-7.16783	-7.16708	-7.16628	-7.16531	-7.16472	-7.16337	-7.16196	-7.16052	-7.16135
1038.62	-7.16173	-7.16114	-7.16039	-7.15958	-7.15883	-7.15802	-7.15704	-7.15656	-7.15523	-7.15383	-7.15241	-7.15399
1040.02	-7.15369	-7.1531	-7.15234	-7.15153	-7.15077	-7.14997	-7.14898	-7.1486	-7.14729	-7.14592	-7.14453	-7.14683
1041.41	-7.14582	-7.14523	-7.14448	-7.14366	-7.14291	-7.1421	-7.14112	-7.14084	-7.13956	-7.13822	-7.13685	-7.13985
1042.81	-7.13811	-7.13752	-7.13677	-7.13596	-7.13521	-7.13441	-7.13343	-7.13326	-7.13201	-7.13069	-7.12936	-7.13304
1044.21	-7.13054	-7.12996	-7.12922	-7.12842	-7.12767	-7.12688	-7.12591	-7.12584	-7.12462	-7.12334	-7.12204	-7.12637
1045.6	-7.1231	-7.12252	-7.1218	-7.12101	-7.12027	-7.11949	-7.11853	-7.11856	-7.11738	-7.11614	-7.11488	-7.11982
1047	-7.11577	-7.11521	-7.1145	-7.11372	-7.113	-7.11223	-7.11129	-7.11142	-7.11028	-7.10907	-7.10785	-7.11338
1048.39	-7.10854	-7.108	-7.1073	-7.10654	-7.10583	-7.10508	-7.10416	-7.10439	-7.10329	-7.10213	-7.10096	-7.10703
1049.79	-7.1014	-7.10087	-7.10019	-7.09946	-7.09876	-7.09804	-7.09713	-7.09746	-7.0964	-7.09529	-7.09417	-7.10075
